# Supplementary material for: Electrochemical Properties of a Rhodium(III) Mono-Terpyridyl Complex and Use as a Catalyst for Light-Driven Hydrogen Evolution in Water
Source: Molecules. 2022 Oct 5;27(19):6614. doi: 10.3390/molecules27196614 (PMC9571878; doi:10.3390/molecules27196614)
Supplement: Supplementary file 1 [file molecules-27-06614-s001.zip › molecules-1917342-supplementary.pdf]

## Supplementary Materials

# Electrochemical Properties of a Rhodium(III) Mono-Terpyridyl Complex and use as a Catalyst for Light-Driven Hydrogen Evolution in Water

Fakourou Camara <sup>1,2</sup>, Thomas Gavaggio <sup>1</sup>, Baptiste Dautreppe <sup>1</sup>, Jérôme Chauvin <sup>1</sup>, Jacques Pécaut <sup>2</sup>, Dmitry Aldakov <sup>2</sup>, Marie-Noëlle Collomb <sup>1,\*</sup> and Jérôme Fortage <sup>1,\*</sup>

<sup>1</sup> DCM, CNRS, Université Grenoble Alpes, 38000 Grenoble, France

<sup>2</sup> SyMMES, IRIG, CEA, CNRS, Université Grenoble Alpes, 38000 Grenoble, France

\* Correspondence: marie-noelle.collomb@univ-grenoble-alpes.fr (M.-N.C.);  
jerome.fortage@univ-grenoble-alpes.fr (J.F.)

## Table of Contents

|                                                                                                                                                                                                                                                                                         |    |
|-----------------------------------------------------------------------------------------------------------------------------------------------------------------------------------------------------------------------------------------------------------------------------------------|----|
| <b>Materials and general experimental details</b> .....                                                                                                                                                                                                                                 | 3  |
| <b>X-ray structure determination of [Rh(tpy)(CH<sub>3</sub>CN)Cl<sub>2</sub>](CF<sub>3</sub>SO<sub>3</sub>) (Rh-tpy)</b> .....                                                                                                                                                          | 4  |
| <b>Table S1.</b> Crystallographic refinement data for [Rh(tpy)(CH <sub>3</sub> CN)Cl <sub>2</sub> ](CF <sub>3</sub> SO <sub>3</sub> ).....                                                                                                                                              | 4  |
| <b>Table S2.</b> Bond lengths in Å for [Rh(tpy)(CH <sub>3</sub> CN)Cl <sub>2</sub> ](CF <sub>3</sub> SO <sub>3</sub> ).....                                                                                                                                                             | 5  |
| <b>Table S3.</b> Bond Angles in ° for [Rh(tpy)(CH <sub>3</sub> CN)Cl <sub>2</sub> ](CF <sub>3</sub> SO <sub>3</sub> ).....                                                                                                                                                              | 5  |
| <b>Table S4.</b> Torsion Angles in ° for [Rh(tpy)(CH <sub>3</sub> CN)Cl <sub>2</sub> ](CF <sub>3</sub> SO <sub>3</sub> ) .....                                                                                                                                                          | 6  |
| <b>Electrochemistry and UV-Visible absorption spectroscopy</b> .....                                                                                                                                                                                                                    | 8  |
| <b>Table S5.</b> Electrochemical potentials of Rh-tpy, Rh2, Ru and NaHA.....                                                                                                                                                                                                            | 8  |
| <b>General procedure for photocatalytic hydrogen generation</b> .....                                                                                                                                                                                                                   | 9  |
| <b>Table S6.</b> Concentrations and corresponding masses for a 5 mL aqueous solution of H <sub>2</sub> A and NaHA at different pH.....                                                                                                                                                  | 9  |
| <b>Table S7.</b> Photocatalytic activities towards hydrogen evolution of all systems studied, in terms of TON <sub>Cat</sub> , TOF <sub>Cat</sub> and n <sub>H<sub>2</sub></sub> .....                                                                                                  | 10 |
| <b>Stern-Volmer plot for the quenching of *Ru by Rh-tpy</b> .....                                                                                                                                                                                                                       | 10 |
| <b>Nanosecond transient absorption spectroscopy</b> .....                                                                                                                                                                                                                               | 10 |
| <b>Figure S1:</b> Transient absorption spectra recorded at different times after laser excitation (λ = 455 nm) of an aqueous solution containing Ru and NaHA/H <sub>2</sub> A at pH 4.5.....                                                                                            | 11 |
| <b>Figure S2:</b> Transient absorption trace on the nanosecond time scale recorded at 510 nm after laser excitation at 455 nm of an aqueous solution containing Ru and NaHA/H <sub>2</sub> A at pH 4.5.....                                                                             | 11 |
| <b>Figure S3:</b> Transient absorption trace on the microsecond time scale recorded at 510 nm after laser excitation at 455 nm of an aqueous solution containing Ru and NaHA/H <sub>2</sub> A at pH 4.5.....                                                                            | 12 |
| <b>Figure S4:</b> Transient absorption trace on the nanosecond time scale recorded at 510 nm after laser excitation at 455 nm of a deaerated aqueous solution containing Ru (100 μM), NaHA/H <sub>2</sub> A (0.1 M) and Rh-tpy (200 μM) at pH 4.5.....                                  | 12 |
| <b>Figure S5:</b> Transient absorption trace on the microsecond time scale recorded at 510 nm after laser excitation at 455 nm of an aqueous solution containing Ru, NaHA/H <sub>2</sub> A and Rh-tpy at pH 4.5.....                                                                    | 13 |
| <b>Estimation of the electron transfer rate between Ru<sup>•-</sup> and HA<sup>•</sup>, and between Ru<sup>•-</sup> and Rh<sup>III</sup>-tpy</b> .....                                                                                                                                  | 14 |
| <b>Figure S6.</b> <sup>1</sup> H NMR spectrum (400 MHz) in D <sub>2</sub> O of [Rh(tpy)(CH <sub>3</sub> CN)Cl <sub>2</sub> ](CF <sub>3</sub> SO <sub>3</sub> ).....                                                                                                                     | 15 |
| <b>Figure S7.</b> Positive ESI-MS spectrum of [Rh(tpy)(CH <sub>3</sub> CN)Cl <sub>2</sub> ](CF <sub>3</sub> SO <sub>3</sub> ).....                                                                                                                                                      | 16 |
| <b>Figure S8.</b> Experimental positive ESI-MS spectrum of [Rh(tpy)(CH <sub>3</sub> CN)Cl <sub>2</sub> ](CF <sub>3</sub> SO <sub>3</sub> ) and simulation of the main isotopic massif at m/z = 446.96 corresponding to [Rh(tpy)(CH <sub>3</sub> CN)Cl <sub>2</sub> ] <sup>+</sup> ..... | 17 |
| <b>Scheme S1.</b> Photosensitizers previously reported in three-component systems for light-driven H <sub>2</sub> production using Rh catalysts in aqueous or hydro-organic solutions.....                                                                                              | 19 |
| <b>Table S8.</b> Summary of the experimental conditions and photocatalytic performances of the various three-component systems (SD/PS/Cat) using Rh catalysts in hydro-organic solution.....                                                                                            | 20 |
| <b>Table S9.</b> Summary of the experimental conditions and photocatalytic performances of various three-component systems (SD/PS/Cat) using Rh catalysts in pure aqueous solution.....                                                                                                 | 22 |
| <b>References</b> .....                                                                                                                                                                                                                                                                 | 23 |

**Materials and general experimental details.** Acetonitrile (CH<sub>3</sub>CN, Fisher, HPLC grade), ethanol (EtOH, Fisher, HPLC grade), diethyl ether (Et<sub>2</sub>O, 98%, VWR), N,N-dimethylformamide (DMF, Fisher, 99,9%, Carlo Erba), sodium trifluoromethanesulfonate (NaCF<sub>3</sub>SO<sub>3</sub>, 98 %, Aldrich), silver trifluoromethanesulfonate (AgCF<sub>3</sub>SO<sub>3</sub>, > 99 %, Aldrich), rhodium(III) chloride hydrate (RhCl<sub>3</sub>·nH<sub>2</sub>O, 38%w Rh, Acros), 2,2';6',2''-terpyridine (tpy, 98%, Merck), dimethylsulfoxide-d<sup>6</sup> (SO(CD<sub>3</sub>)<sub>2</sub>, Euriso-top, 99.8%D), deuterium oxide-d<sub>2</sub> (D<sub>2</sub>O, Euriso-top, 99.97%D), [Ru(bpy)<sub>3</sub>]Cl<sub>2</sub> (**Ru**) (99%, Aldrich), L-ascorbic acid (H<sub>2</sub>A, 99%, Fischer), sodium L-ascorbate (NaHA, 99%, Acros), sodium acetate (NaOAc, > 99%, Fischer), acetic acid (AcOH, > 98%, VWR) and reference gas (1% and 5% H<sub>2</sub> in N<sub>2</sub>, Air Liquide) were purchased from commercial suppliers. All reagents and solvents were used as received. Purification of water (15.0 MΩ cm, 24°C) was performed with a milli-Q system (Purelab option, Elga). <sup>1</sup>H NMR spectra were recorded on a Bruker 400 MHz spectrometer. Chemical shifts for <sup>1</sup>H NMR spectra are referenced relative to residual protium in deuterated dimethylsulfoxide (SO(CD<sub>3</sub>)<sub>2</sub>, δ = 2.50 ppm) and deuterium oxide (D<sub>2</sub>O, δ = 4.80 ppm). <sup>1</sup>H NMR and mass spectrometry were performed within the ICMG Chemistry Nanobio Platform, Grenoble. Electrospray ionisation mass spectrometry (ESI-MS) were performed on a Bruker Esquire 3000 Plus ion trap spectrometer equipped with an electrospray ion source (ESI). The samples were analysed in either positive or negative mode ionization mode as well as in MS<sup>2</sup> by direct perfusion in the ESI-MS interface. The analyses were carried out in DMF for [Rh(tpy)Cl<sub>3</sub>] and in a mixture of CH<sub>3</sub>CN/DMF/H<sub>2</sub>O for [Rh(tpy)(CH<sub>3</sub>CN)Cl<sub>2</sub>](CF<sub>3</sub>SO<sub>3</sub>) (**Rh-tpy**) at a complex concentration of approximately 1 μmol L<sup>-1</sup>. The infrared (IR) spectra were recorded on a Perkin-Elmer Spectrum GX FT-IR spectrometer on powder samples in KBr pellets with a 2%w concentration.

**X-ray structure determination of [Rh(tpy)(CH<sub>3</sub>CN)Cl<sub>2</sub>](CF<sub>3</sub>SO<sub>3</sub>), denoted Rh-tpy.** Single translucent light yellow prism-shaped crystals of [Rh(tpy)(CH<sub>3</sub>CN)Cl<sub>2</sub>](CF<sub>3</sub>SO<sub>3</sub>) were obtained by recrystallization *via* a slow diffusion of diethyl ether into an acetonitrile solution of complex. A suitable crystal 0.16×0.15×0.07 mm<sup>3</sup> was selected and mounted on a suitable support on an Xcalibur, Sapphire3 diffractometer. The crystal was kept at a steady  $T = 150(1)$  K during data collection. The structure was solved with the ShelXS-97 (Sheldrick, 1990) structure solution program using the Intrinsic Phasing solution method and by using **Olex2** as the graphical interface [1]. The model was refined with version of XL n/a (Sheldrick, 2008) using Least Squares minimization.

**Table S1.** Crystallographic refinement data for the structure of [Rh(tpy)(CH<sub>3</sub>CN)Cl<sub>2</sub>](CF<sub>3</sub>SO<sub>3</sub>)

|                                             | [Rh(tpy)(CH <sub>3</sub> CN)Cl <sub>2</sub> ](CF <sub>3</sub> SO <sub>3</sub> )                  |
|---------------------------------------------|--------------------------------------------------------------------------------------------------|
| CDCD reference                              | 2173038                                                                                          |
| Empirical formula                           | C <sub>18</sub> H <sub>14</sub> Cl <sub>2</sub> F <sub>3</sub> N <sub>4</sub> O <sub>3</sub> RhS |
| Formula weight                              | 597.20                                                                                           |
| Colour, shape                               | Yellow, prism                                                                                    |
| Crystal size, mm                            | 0.16 x 0.15 x 0.07                                                                               |
| Crystal system                              | Triclinic                                                                                        |
| Space group                                 | $P 1$                                                                                            |
| $a$ , Å                                     | 8.6026(2)                                                                                        |
| $b$ , Å                                     | 8.9644(2)                                                                                        |
| $c$ , Å                                     | 14.5054(3)                                                                                       |
| $\alpha$ , deg.                             | 106.371(2)                                                                                       |
| $\beta$ , deg.                              | 102.674(2)                                                                                       |
| $\gamma$ , deg.                             | 93.505(2)                                                                                        |
| $V$ , Å <sup>3</sup>                        | 1038.04(4)                                                                                       |
| $Z$                                         | 2                                                                                                |
| $T$ , K                                     | 150(1)                                                                                           |
| Radiation type                              | Mo K $\alpha$                                                                                    |
| Wavelength, Å                               | 0.71073                                                                                          |
| $\rho$ (calc), Mg/m <sup>3</sup>            | 1.911                                                                                            |
| $\beta$ mm <sup>-1</sup>                    | 1.238                                                                                            |
| $\theta$ range, deg.                        | 2.39 to 30.51                                                                                    |
| Refl. collected/unique ( $R_{\text{int}}$ ) | 25279/6335(0.0263)                                                                               |
| Refl. observed with $I_0 > 2\sigma(I_0)$    | 5731                                                                                             |
| Data/restraints/parameters                  | 6335/0/345                                                                                       |
| GooF                                        | 1.063                                                                                            |
| $R1$                                        | 0.0250                                                                                           |
| $wR2$                                       | 0.0566                                                                                           |

**Table S2.** Bond lengths in Å for [Rh(tpy)(CH<sub>3</sub>CN)Cl<sub>2</sub>](CF<sub>3</sub>SO<sub>3</sub>)

| Atom | Atom | Length     | Atom | Atom | Length     |
|------|------|------------|------|------|------------|
| Rh1  | Cl1  | 2.3530(5)  | C6   | C7   | 1.388(2)   |
| Rh1  | Cl2  | 2.3067(4)  | C7   | C8   | 1.387(3)   |
| Rh1  | N1   | 2.0258(14) | C8   | C9   | 1.380(3)   |
| Rh1  | N2   | 1.9386(14) | C9   | C10  | 1.389(3)   |
| Rh1  | N3   | 2.0417(14) | C10  | C11  | 1.475(3)   |
| Rh1  | N21  | 2.0220(14) | C11  | C12  | 1.387(2)   |
| N1   | C1   | 1.336(2)   | C12  | C13  | 1.388(3)   |
| N1   | C5   | 1.367(2)   | C13  | C14  | 1.371(3)   |
| N2   | C6   | 1.343(2)   | C14  | C15  | 1.389(3)   |
| N2   | C10  | 1.341(2)   | C21  | C22  | 1.453(3)   |
| N3   | C11  | 1.361(2)   | S1   | O1   | 1.4371(15) |
| N3   | C15  | 1.342(2)   | S1   | O2   | 1.4380(15) |
| N21  | C21  | 1.133(2)   | S1   | O3   | 1.4404(15) |
| C1   | C2   | 1.383(3)   | S1   | C1S  | 1.818(2)   |
| C2   | C3   | 1.375(3)   | F1   | C1S  | 1.332(2)   |
| C3   | C4   | 1.387(3)   | F2   | C1S  | 1.336(2)   |
| C4   | C5   | 1.383(2)   | F3   | C1S  | 1.333(2)   |
| C5   | C6   | 1.476(2)   |      |      |            |

**Table S3.** Bond Angles in ° for [Rh(tpy)(CH<sub>3</sub>CN)Cl<sub>2</sub>](CF<sub>3</sub>SO<sub>3</sub>)

| Atom | Atom | Atom | Angle/°    | Atom | Atom | Atom | Angle/°    |
|------|------|------|------------|------|------|------|------------|
| Cl2  | Rh1  | Cl1  | 93.570(18) | C4   | C5   | C6   | 124.83(16) |
| N1   | Rh1  | Cl1  | 99.28(4)   | N2   | C6   | C5   | 113.34(14) |
| N1   | Rh1  | Cl2  | 88.71(4)   | N2   | C6   | C7   | 118.71(16) |
| N1   | Rh1  | N3   | 162.03(6)  | C7   | C6   | C5   | 127.93(16) |
| N2   | Rh1  | Cl1  | 177.84(4)  | C8   | C7   | C6   | 118.16(18) |
| N2   | Rh1  | Cl2  | 88.56(4)   | C9   | C8   | C7   | 121.63(18) |
| N2   | Rh1  | N1   | 81.07(6)   | C8   | C9   | C10  | 118.47(18) |
| N2   | Rh1  | N3   | 81.00(6)   | N2   | C10  | C9   | 118.52(17) |
| N2   | Rh1  | N21  | 87.90(6)   | N2   | C10  | C11  | 113.22(15) |
| N3   | Rh1  | Cl1  | 98.68(4)   | C9   | C10  | C11  | 128.24(16) |
| N3   | Rh1  | Cl2  | 89.80(4)   | N3   | C11  | C10  | 115.32(14) |
| N21  | Rh1  | Cl1  | 89.97(4)   | N3   | C11  | C12  | 120.55(18) |
| N21  | Rh1  | Cl2  | 176.01(4)  | C12  | C11  | C10  | 124.11(17) |
| N21  | Rh1  | N1   | 88.90(5)   | C11  | C12  | C13  | 119.16(19) |
| N21  | Rh1  | N3   | 91.48(5)   | C14  | C13  | C12  | 119.59(17) |
| C1   | N1   | Rh1  | 127.02(12) | C13  | C14  | C15  | 119.51(19) |
| C1   | N1   | C5   | 120.10(15) | N3   | C15  | C14  | 120.96(19) |
| C5   | N1   | Rh1  | 112.88(11) | N21  | C21  | C22  | 178.53(18) |
| C6   | N2   | Rh1  | 117.63(11) | O1   | S1   | O2   | 115.53(9)  |
| C10  | N2   | Rh1  | 117.91(12) | O1   | S1   | O3   | 115.08(10) |
| C10  | N2   | C6   | 124.44(15) | O1   | S1   | C1S  | 103.09(10) |
| C11  | N3   | Rh1  | 112.48(11) | O2   | S1   | O3   | 114.62(10) |
| C15  | N3   | Rh1  | 127.32(13) | O2   | S1   | C1S  | 103.01(9)  |
| C15  | N3   | C11  | 120.19(15) | O3   | S1   | C1S  | 102.97(9)  |
| C21  | N21  | Rh1  | 170.48(14) | F1   | C1S  | S1   | 112.08(14) |
| N1   | C1   | C2   | 121.27(18) | F1   | C1S  | F2   | 107.29(17) |
| C3   | C2   | C1   | 119.06(18) | F1   | C1S  | F3   | 107.07(16) |
| C2   | C3   | C4   | 120.05(17) | F2   | C1S  | S1   | 111.61(13) |
| C5   | C4   | C3   | 118.67(18) | F3   | C1S  | S1   | 111.49(14) |
| N1   | C5   | C4   | 120.60(16) | F3   | C1S  | F2   | 107.01(16) |
| N1   | C5   | C6   | 114.54(14) |      |      |      |            |

**Table S4.** Torsion Angles in ° for [Rh(tpy)(CH<sub>3</sub>CN)Cl<sub>2</sub>](CF<sub>3</sub>SO<sub>3</sub>)

| Atom | Atom | Atom | Atom | Angle/°     |
|------|------|------|------|-------------|
| Rh1  | N1   | C1   | C2   | -177.09(14) |
| Rh1  | N1   | C5   | C4   | 174.54(13)  |
| Rh1  | N1   | C5   | C6   | -7.48(17)   |
| Rh1  | N2   | C6   | C5   | 1.89(18)    |
| Rh1  | N2   | C6   | C7   | -179.29(12) |
| Rh1  | N2   | C10  | C9   | -178.44(12) |
| Rh1  | N2   | C10  | C11  | 3.01(18)    |
| Rh1  | N3   | C11  | C10  | -0.30(17)   |
| Rh1  | N3   | C11  | C12  | -179.15(13) |
| Rh1  | N3   | C15  | C14  | 179.05(12)  |
| Rh1  | N21  | C21  | C22  | 116(7)      |
| Cl1  | Rh1  | N1   | C1   | 8.79(15)    |
| Cl1  | Rh1  | N1   | C5   | -171.21(10) |
| Cl1  | Rh1  | N2   | C6   | 94.7(12)    |
| Cl1  | Rh1  | N2   | C10  | -84.2(12)   |
| Cl1  | Rh1  | N3   | C11  | 179.29(10)  |
| Cl1  | Rh1  | N3   | C15  | -1.44(14)   |
| Cl1  | Rh1  | N21  | C21  | 169.0(8)    |
| Cl2  | Rh1  | N1   | C1   | -84.61(15)  |
| Cl2  | Rh1  | N1   | C5   | 95.38(11)   |
| Cl2  | Rh1  | N2   | C6   | -93.58(12)  |
| Cl2  | Rh1  | N2   | C10  | 87.50(12)   |
| Cl2  | Rh1  | N3   | C11  | -87.13(11)  |
| Cl2  | Rh1  | N3   | C15  | 92.14(14)   |
| Cl2  | Rh1  | N21  | C21  | 16.4(13)    |
| N1   | Rh1  | N2   | C6   | -4.66(12)   |
| N1   | Rh1  | N2   | C10  | 176.42(12)  |
| N1   | Rh1  | N3   | C11  | -1.9(2)     |
| N1   | Rh1  | N3   | C15  | 177.34(16)  |
| N1   | Rh1  | N21  | C21  | 69.8(8)     |
| N1   | C1   | C2   | C3   | 1.6(3)      |
| N1   | C5   | C6   | N2   | 3.9(2)      |
| N1   | C5   | C6   | C7   | -174.78(16) |
| N2   | Rh1  | N1   | C1   | -173.36(15) |
| N2   | Rh1  | N1   | C5   | 6.63(11)    |
| N2   | Rh1  | N3   | C11  | 1.45(11)    |
| N2   | Rh1  | N3   | C15  | -179.28(15) |
| N2   | Rh1  | N21  | C21  | -11.3(8)    |
| N2   | C6   | C7   | C8   | -1.5(2)     |
| N2   | C10  | C11  | N3   | -1.7(2)     |
| N2   | C10  | C11  | C12  | 177.13(16)  |
| N3   | Rh1  | N1   | C1   | -169.98(16) |
| N3   | Rh1  | N1   | C5   | 10.0(2)     |
| N3   | Rh1  | N2   | C6   | 176.39(12)  |
| N3   | Rh1  | N2   | C10  | -2.53(12)   |
| N3   | Rh1  | N21  | C21  | -92.3(8)    |
| N3   | C11  | C12  | C13  | -0.1(3)     |
| N21  | Rh1  | N1   | C1   | 98.59(15)   |
| N21  | Rh1  | N1   | C5   | -81.42(11)  |
| N21  | Rh1  | N2   | C6   | 84.56(12)   |

|     |     |     |     |             |
|-----|-----|-----|-----|-------------|
| N21 | Rh1 | N2  | C10 | -94.36(12)  |
| N21 | Rh1 | N3  | C11 | 89.09(11)   |
| N21 | Rh1 | N3  | C15 | -91.64(14)  |
| C1  | N1  | C5  | C4  | -5.5(2)     |
| C1  | N1  | C5  | C6  | 172.51(15)  |
| C1  | C2  | C3  | C4  | -3.6(3)     |
| C2  | C3  | C4  | C5  | 1.1(3)      |
| C3  | C4  | C5  | N1  | 3.4(3)      |
| C3  | C4  | C5  | C6  | -174.35(16) |
| C4  | C5  | C6  | N2  | -178.21(16) |
| C4  | C5  | C6  | C7  | 3.1(3)      |
| C5  | N1  | C1  | C2  | 2.9(3)      |
| C5  | C6  | C7  | C8  | 177.12(16)  |
| C6  | N2  | C10 | C9  | 2.7(2)      |
| C6  | N2  | C10 | C11 | -175.83(14) |
| C6  | C7  | C8  | C9  | 1.2(3)      |
| C7  | C8  | C9  | C10 | 1.1(3)      |
| C8  | C9  | C10 | N2  | -2.9(3)     |
| C8  | C9  | C10 | C11 | 175.36(17)  |
| C9  | C10 | C11 | N3  | 179.94(16)  |
| C9  | C10 | C11 | C12 | -1.3(3)     |
| C10 | N2  | C6  | C5  | -179.27(14) |
| C10 | N2  | C6  | C7  | -0.5(2)     |
| C10 | C11 | C12 | C13 | -178.82(16) |
| C11 | N3  | C15 | C14 | -1.7(2)     |
| C11 | C12 | C13 | C14 | -1.2(3)     |
| C12 | C13 | C14 | C15 | 1.0(3)      |
| C13 | C14 | C15 | N3  | 0.5(3)      |
| C15 | N3  | C11 | C10 | -179.63(14) |
| C15 | N3  | C11 | C12 | 1.5(2)      |
| O1  | S1  | C1S | F1  | 61.60(16)   |
| O1  | S1  | C1S | F2  | -178.03(14) |
| O1  | S1  | C1S | F3  | -58.41(16)  |
| O2  | S1  | C1S | F1  | -177.88(14) |
| O2  | S1  | C1S | F2  | -57.51(16)  |
| O2  | S1  | C1S | F3  | 62.11(16)   |
| O3  | S1  | C1S | F1  | -58.41(17)  |
| O3  | S1  | C1S | F2  | 61.96(17)   |
| O3  | S1  | C1S | F3  | -178.42(15) |

**Electrochemistry and UV-Visible absorption spectroscopy.** The electrochemical measurements were run under an argon atmosphere into a dry-glove box at room temperature. Cyclic voltammetry and electrolysis experiments were performed using a Solartron Analytical Instrument potentiostat (Modulab XM MTS) with XM-studio as software. A standard three-electrode electrochemical cell was used and electrochemical experiments were carried out in DMF (7 mL) with 0.1 M [Bu<sub>4</sub>N]ClO<sub>4</sub> as electrolyte and 0.5 mM of **Rh-tpy**. The working electrode, polished with 2 μm diamond paste (MecaprexPresi), was a carbon vitreous disk (3 mm in diameter) for cyclic voltammetry ( $E_{p_a}$ , anodic peak potential;  $E_{p_c}$ , cathodic peak potential;  $E_{1/2} = (E_{p_a} + E_{p_c})/2$ ;  $\Delta E_p = E_{p_a} - E_{p_c}$ ). Exhaustive electrolyses were carried out on a reticulated vitreous carbon electrode 60 PPI (the electrosynthesis Co. Inc.) three-dimensional meshes (1.8 cm x 0.7 cm x 0.4 cm). The auxiliary electrode was a Pt wire in DMF + 0.1 M [Bu<sub>4</sub>N]ClO<sub>4</sub>. Potentials were referred to an Ag/AgNO<sub>3</sub> 0.01 M reference electrode in CH<sub>3</sub>CN + 0.1 M [Bu<sub>4</sub>N]ClO<sub>4</sub>. The potential of our reference electrode Ag<sup>+</sup> (0.01 M AgNO<sub>3</sub>, 0.1 M [Bu<sub>4</sub>N]ClO<sub>4</sub>, CH<sub>3</sub>CN)/Ag was carefully checked at the end of each experiment by adding ferrocene. The potential of the ferrocenium/ferrocene (Fc<sup>+/0</sup>) couple (reversible wave) appears at  $E_{1/2} = +100$  mV. Potentials referred to our Ag/AgNO<sub>3</sub> can be thus converted to the Fc<sup>+/0</sup> couple by subtracting 100 mV and converted to Saturated Calomel Electrode (SCE) by adding 298 mV. According to Pavlishchuk et al. [2], the potential of Fc<sup>+/0</sup> couple is +87 mV *versus* a reference electrode Ag<sup>+</sup> (0.01 M AgNO<sub>3</sub>, 0.1 M [Et<sub>4</sub>N]ClO<sub>4</sub>, CH<sub>3</sub>CN)/Ag. The UV-Vis spectra were recorded with a MCS 501 UV-NIR (Carl Zeiss) spectrophotometer equipped with an automatic shutter. The light sources are halogen (CLH 500 20 W) and deuterium lamps (CLD 500) with optic fibers (041.002–UV SN 012105) in order to perform the spectroelectrochemical experiments into the glove box with a 1 mm path-length probe.

**Table S5.** Electrochemical potentials of **Rh-tpy**, **Rh2**, **Ru** and NaHA. Potentials are referred *versus* Ag/0.01 M AgNO<sub>3</sub> in acetonitrile and *versus* Saturated Calomel Electrode (SCE) in water.

| Compound                                                                                                                                  | Solvent                                                            | Redox potentials/V ( $\Delta E_p$ /mV) vs Ag/0.01 M AgNO <sub>3</sub>               |                                                                  |                                                                       |
|-------------------------------------------------------------------------------------------------------------------------------------------|--------------------------------------------------------------------|-------------------------------------------------------------------------------------|------------------------------------------------------------------|-----------------------------------------------------------------------|
| [Rh <sup>III</sup> (tpy)(CH <sub>3</sub> CN)Cl <sub>2</sub> ](CF <sub>3</sub> SO <sub>3</sub> )<br>( <b>Rh-tpy</b> ) <sup>This work</sup> | DMF, 0.1M<br>[Bu <sub>4</sub> N]ClO <sub>4</sub>                   | $E_{p_c}$ = -1.13 V<br>$E_{p_a}$ = -0.72 V<br>(Rh <sup>III</sup> /Rh <sup>I</sup> ) | $E_{1/2}$ = -1.95 V<br>(130)<br>(tpy/tpy <sup>+</sup> )          |                                                                       |
| [Rh <sup>III</sup> (dmbpy) <sub>2</sub> Cl <sub>2</sub> ](BF <sub>4</sub> )<br>( <b>Rh2</b> )[3]                                          | CH <sub>3</sub> CN,<br>0.1M<br>[Bu <sub>4</sub> N]ClO <sub>4</sub> | $E_{p_c}$ = -1.28 V<br>$E_{p_a}$ = -0.72 V<br>(Rh <sup>III</sup> /Rh <sup>I</sup> ) | $E_{1/2}$ = -1.77 V (70)<br>(bpy/bpy <sup>+</sup> )              | $E_{1/2}$ = -2.01 V (60)<br>(bpy/bpy <sup>+</sup> )                   |
| [Ru(bpy) <sub>3</sub> ]Cl <sub>2</sub> ( <b>Ru</b> )[4]                                                                                   | CH <sub>3</sub> CN,<br>0.1M<br>[Bu <sub>4</sub> N]ClO <sub>4</sub> | $E_{1/2}$ = +0.98 V<br>(80)<br>(Ru <sup>III</sup> /Ru <sup>II</sup> )               | $E_{1/2}$ = -1.64 V (60)<br>(Ru <sup>II</sup> /Ru <sup>-</sup> ) | $E_{1/2}$ = -1.83 (60) and<br>-2.08 V (70)<br>(bpy/bpy <sup>+</sup> ) |
| Compound                                                                                                                                  | Solvent                                                            | Redox potentials/V ( $\Delta E_p$ /mV) vs SCE                                       |                                                                  |                                                                       |
| [Rh <sup>III</sup> (dmbpy) <sub>2</sub> Cl <sub>2</sub> ](Cl)<br>( <b>Rh2</b> )[3]                                                        | H <sub>2</sub> O<br>(pH 8)                                         | $E_{p_c}$ = -0.79 V<br>$E_{p_a}$ = -0.25 V<br>(Rh <sup>III</sup> /Rh <sup>I</sup> ) |                                                                  |                                                                       |
| [Ru(bpy) <sub>3</sub> ]Cl <sub>2</sub> ( <b>Ru</b> )[5, 6]                                                                                | H <sub>2</sub> O<br>(pH 7)                                         | $E_{1/2}$ = +1.03 V<br>(Ru <sup>III</sup> /Ru <sup>II</sup> )                       | $E_{1/2}$ = -1.50 V<br>(Ru <sup>II</sup> /Ru <sup>-</sup> )      |                                                                       |
| *[Ru(bpy) <sub>3</sub> ]Cl <sub>2</sub> ( <b>*Ru</b> )[5, 6] <sup>a</sup>                                                                 | H <sub>2</sub> O<br>(pH 7)                                         | -1.07 V<br>(Ru <sup>III</sup> /*Ru <sup>II</sup> )                                  | +0.60 V<br>(*Ru <sup>II</sup> /Ru <sup>-</sup> )                 |                                                                       |
| HA <sup>•</sup> [7]                                                                                                                       | H <sub>2</sub> O<br>(pH 3.58)                                      | $E_{p_a}$ = +0.11 V                                                                 |                                                                  |                                                                       |

<sup>a</sup> Oxidation and reduction potentials of the excited state of **Ru** (denoted **\*Ru**) are estimated by using the formula:  $E_{1/2}(\text{Ru}^{\text{III}}/\text{*Ru}^{\text{II}}) = E_{1/2}(\text{Ru}^{\text{III}}/\text{Ru}^{\text{II}}) - E_{0,0}$  and  $E_{1/2}(\text{*Ru}^{\text{II}}/\text{Ru}^{\text{+}}) = E_{1/2}(\text{Ru}^{\text{II}}/\text{Ru}^{\text{+}}) + E_{0,0}$ .  $E_{0,0}$  is the energy level of the relaxed triplet excited state (<sup>3</sup>MLCT) of **Ru** in water, which is equal to 2.1 eV.

**General procedure for photocatalytic hydrogen generation.** A 5 mL graduated flask was charged with the  $[\text{Ru}^{\text{II}}(\text{bpy})_3](\text{Cl})_2$  (**Ru**) photosensitizer weighted as a solid (1.98 mg), in order to obtain a **Ru** concentration of 530  $\mu\text{M}$ . Then 14, 71 and 143  $\mu\text{L}$  of a rhodium catalyst solution ( $[\text{Rh}^{\text{III}}(\text{tpy})(\text{MeCN})\text{Cl}_2](\text{CF}_3\text{SO}_3)$  (**Rh-tpy**) or  $[\text{Rh}^{\text{III}}(\text{dmbpy})_2\text{Cl}_2]\text{Cl}$  (**Rh2**) at 0.35 mM) in Milli-Q water or an aqueous 1 M acetate buffer (at pH 4.0, 4.5 or 4.8) were added into the 5 mL flask containing Ru in order to obtain a rhodium concentration of 1, 5 and 10  $\mu\text{M}$ , respectively. After completing the volume to 5 mL with Milli-Q or 1 M acetate buffer, the **Ru** concentration (530  $\mu\text{M}$ ) was checked by UV-Vis using a cuvette of 1 mm optical pathlength (absorbance of 0.77 at 452 nm,  $\epsilon = 14\,600\text{ M}^{-1}\text{ cm}^{-1}$ ). The solution was then transferred in a homemade glass tube with a diameter of 2 cm fused with a round bottom flask (head space volume of 165 mL for experiments with **Rh-tpy** and 193 mL for experiments with **Rh2**) containing a magnetic stirrer (volume < 0.1 mL), sodium ascorbate (NaHA) and ascorbic acid ( $\text{H}_2\text{A}$ ), as solids and with the appropriate and respective concentrations in function of pH (4.0, 4.5 or 4.8) and the total NaHA/ $\text{H}_2\text{A}$  concentration used (*i.e.* 1.1 M for aqueous solutions with only Milli-Q water or 0.1 M for aqueous solutions of 1 M acetate buffer, see Table S6). The tube was sealed with a rubber septum, protected from light with aluminum foil before irradiation experiments, and the solution was degassed for 45 min by argon bubbling.

Aqueous solutions of 1 M acetate buffer at different pHs (4.0, 4.5 or 4.8) were prepared by mixing AcOH (0.183 mL, 0.64 M) and NaOAc (0.148 g, 0.36 M) in Milli-Q water. Then the pH was adjusted to desired value by adding suitable amounts of NaOH or HCl.

For photocatalysis, continuous irradiation was performed at 298 K under stirring with a xenon lamp (150 W, Hamamatsu L8253, type LC8-03) equipped with a 400 – 700 nm large band filter which was placed 4 cm from the sample ( $P = 100\text{ mW}\cdot\text{cm}^{-2}$  measured with a calibrated Avantes spectrometer AvaSpec-ULS2048CL-EVORS-UA, with a slit of 20  $\mu\text{M}$ , equipped with a fiber cable FC-UVIR400-1 and a Cosine corrector CC-UV/VIS/NIR-8MM). The amount of hydrogen evolved was quantified from an analysis of the gas mixture in the headspace of the glass tube (sampling of 100  $\mu\text{L}$  of gas) by gas chromatography (Perkin Elmer Autosystem XL Gas Chromatograph equipped with a 5 Å molecular sieve column (oven temperature = 303 K) and a thermal conductivity detector (TCD)), which uses argon as a carrier gas. Prior to each experiment, GC/TCD calibration was carried out by using two samples of the reference gas (1.045 % and 4.967 %  $\text{H}_2$  in  $\text{N}_2$ ).

The turnover number (TON) and turnover frequency (TOF) for  $\text{H}_2$  production were determined as previously described [3, 8].

**Table S6.** Concentrations and corresponding masses for a 5 mL aqueous solution of ascorbic acid ( $\text{H}_2\text{A}$ ) and sodium ascorbate (NaHA) at different pH with total NaHA/ $\text{H}_2\text{A}$  concentrations of 1.1<sup>a</sup> and 0.1 M<sup>b</sup> considering a  $\text{pK}_\text{A}$  of 4.1 for the couple NaHA/ $\text{H}_2\text{A}$ .

| pH               | NaHA             | $\text{H}_2\text{A}$ |
|------------------|------------------|----------------------|
| 4.0 <sup>a</sup> | 0.487 M (482 mg) | 0.613 M (540 mg)     |
| 4.0 <sup>b</sup> | 44.3 mM (44 mg)  | 55.7 mM (49 mg)      |
| 4.5 <sup>b</sup> | 71.5 mM (71 mg)  | 28.5 mM (25 mg)      |
| 4.8 <sup>b</sup> | 83.4 mM (83 mg)  | 16.6 mM (15 mg)      |

**Table S7.** Photocatalytic activities towards hydrogen evolution of all systems studied in this work, in terms of  $\text{TON}_{\text{Cat}}$ ,  $\text{TOF}_{\text{Cat}, \text{H}_2}$  and  $V_{\text{H}_2}$ . Experiments were carried out at 25° C in an deaerated aqueous solution (5 mL) buffered with 1.1 M NaHA/H<sub>2</sub>A<sup>a</sup> or with 1 M sodium acetate and 0.1 M NaHA/H<sub>2</sub>A,<sup>b</sup> containing the [Ru<sup>II</sup>(bpy)<sub>3</sub>](Cl)<sub>2</sub> (**Ru**, 530 μM) photosensitizer (PS) and a catalyst (Cat), [Rh<sup>III</sup>(tpy)(CH<sub>3</sub>CN)Cl<sub>2</sub>](CF<sub>3</sub>SO<sub>3</sub>) (**Rh-tpy**), [Rh<sup>III</sup>(dmbpy)<sub>2</sub>Cl<sub>2</sub>]Cl (**Rh2**), or [Co<sup>III</sup>(CR14)Cl<sub>2</sub>]Cl (**Co**) previously reported {Gueret, 2018 #46} at various concentrations under visible-light ( $\lambda = 400 - 700$  nm) irradiation.

| PS<br>[μM]      | Cat<br>[μM]                   | pH               | PS/Cat<br>ratio | $\text{TON}_{\text{Cat}}^c$<br>( $\text{TON}_{\text{Cat}}^*$ ) <sup>d</sup> | Initial<br>$\text{TOF}_{\text{Cat}}^c$ | $n_{\text{H}_2}^c$ ( $n_{\text{H}_2}^*$ ) <sup>d</sup><br>μmol | $v_{\text{H}_2}^c$ ( $v_{\text{H}_2}^*$ ) <sup>d</sup><br>mL | Irrad.<br>Time <sup>e</sup> |
|-----------------|-------------------------------|------------------|-----------------|-----------------------------------------------------------------------------|----------------------------------------|----------------------------------------------------------------|--------------------------------------------------------------|-----------------------------|
| <b>Ru</b> (530) | -                             | 4.5 <sup>b</sup> | -               | -                                                                           | -                                      | 6.14                                                           | 0.15                                                         | 21.0 h                      |
| <b>Ru</b> (530) | <b>Rh-tpy</b> (10)            | 4.0 <sup>a</sup> | 53/1            | 220                                                                         | 95                                     | 11.0                                                           | 0.27                                                         | 21.7 h                      |
| <b>Ru</b> (530) | <b>Rh-tpy</b> (10)            | 4.0 <sup>b</sup> | 53/1            | 379                                                                         | 38                                     | 18.9                                                           | 0.46                                                         | 22.2 h                      |
| <b>Ru</b> (530) | <b>Rh-tpy</b> (10)            | 4.5 <sup>b</sup> | 53/1            | 423 (300)                                                                   | 21                                     | 21.1 (14.96)                                                   | 0.52 (0.37)                                                  | 21.5 h                      |
| <b>Ru</b> (530) | <b>Rh-tpy</b> (10)<br>with Hg | 4.5 <sup>b</sup> | 53/1            | 433 (309)                                                                   | 39                                     | 21.6 (15.46)                                                   | 0.53<br>(0.38)                                               | 23.0 h                      |
| <b>Ru</b> (530) | <b>Rh-tpy</b> (10)            | 4.8 <sup>b</sup> | 53/1            | 333                                                                         | 26                                     | 16.7                                                           | 0.27                                                         | 22.7 h                      |
| <b>Ru</b> (530) | <b>Rh-tpy</b> (1)             | 4.5 <sup>b</sup> | 530/1           | 2242 (1012)                                                                 | 2000                                   | 11.2 (5.06)                                                    | 0.27 (0.12)                                                  | 22.3 h                      |
| <b>Ru</b> (530) | <b>Rh-tpy</b> (5)             | 4.5 <sup>b</sup> | 106/1           | 804 (558)                                                                   | 293                                    | 20.1 (13.96)                                                   | 0.49 (0.34)                                                  | 25.0 h                      |
| <b>Ru</b> (530) | <b>Rh2</b> (1)                | 4.5 <sup>b</sup> | 530/1           | 2010 (772)                                                                  | 6664                                   | 10.0 (3.86)                                                    | 0.24 (0.09)                                                  | 22.0 h                      |
| <b>Ru</b> (530) | <b>Rh2</b> (5)                | 4.5 <sup>b</sup> | 106/1           | 1023 (778)                                                                  | 1492                                   | 25.6 (19.46)                                                   | 0.62 (0.48)                                                  | 24.0 h                      |
| <b>Ru</b> (530) | <b>Rh2</b> (10)               | 4.5 <sup>b</sup> | 53/1            | 1261 (1139)                                                                 | 639                                    | 63.1 (56.96)                                                   | 1.55 (1.40)                                                  | 21.7 h                      |
| <b>Ru</b> (500) | -                             | 4.5              | -               | -                                                                           | -                                      |                                                                | 0.13                                                         | 21 h                        |
| <b>Ru</b> (500) | <b>Co</b> (5)                 | 4.5              | 100/1           | 2034 (1822)                                                                 | 2250                                   | 51.0 (45.7)                                                    | 1.25 (1.12)                                                  | 22 h                        |
| <b>Ru</b> (500) | <b>Co</b> (10)                | 4.5              | 50/1            | 1192 (1086)                                                                 | 900                                    | 59.6 (54.3)                                                    | 1.46 (1.33)                                                  | 22 h                        |
| <b>Ru</b> (500) | <b>Co</b> (50)                | 4.5              | 10/1            | 912 (890)                                                                   | 240                                    | 228.2<br>(222.9)                                               | 5.59 (5.46)                                                  | 22 h                        |

<sup>c</sup> $\text{TON}_{\text{Cat}}$  and  $\text{TOF}_{\text{Cat}}$  are respectively the maximum turnover number and the initial turnover frequencies ( $\text{TOF}_{\text{Cat}} = \text{TON}_{\text{Cat}} \text{ h}^{-1}$ ) per catalyst exhibited by the system,  $n_{\text{H}_2}$  and  $V_{\text{H}_2}$  the total mole number and volume of H<sub>2</sub> produced by the system until gas evolution stopped. <sup>d</sup> $\text{TON}_{\text{Cat}}^*$ ,  $n_{\text{H}_2}^*$  and  $V_{\text{H}_2}^*$  are the corrected values of  $\text{TON}_{\text{Cat}}$ ,  $n_{\text{H}_2}$  and  $V_{\text{H}_2}$ , respectively, obtained by subtracting the production of H<sub>2</sub> stemming from **Ru** without catalyst. <sup>e</sup>Irrad. time: time of irradiation after which H<sub>2</sub> production stopped.

**Stern-Volmer plot for the quenching of \*Ru by Rh-tpy.** The Stern-Volmer experiments were carried out with several deaerated aqueous solutions (1 M acetate buffer at pH 4.5) containing **Ru** (10 μM) in presence of **Rh-tpy** at different concentrations (0; 0.06; 0.08; 0.1; 0.15; 0.2; 0.3 mM); the latter solutions were prepared in a glove box under argon atmosphere within quartz cells (cell width = 1 x 1 cm<sup>2</sup>). The emission decays ( $\tau$ ) of the **Ru** excited state (**\*Ru**) were recorded after excitation at 409 nm with a Picosecond Pulsed Diode Laser (PDL 800D PicoQuant, Diode Laser: LDH-P-C-405) and using a time correlated single photon counting detection (picoHarp 300). The lifetimes of **\*Ru** ( $\tau$ ) in presence of **Rh-tpy**, estimated from the fitting of the decay of **\*Ru** luminescence at 610 nm, were used to calculate the  $\tau_0/\tau$  value to trace the Stern Volmer plot;  $\tau_0$  is the lifetime of **\*Ru** alone ( $\tau_0 = 620$  ns). The quenching of **\*Ru** by **Rh-tpy** was estimated to be  $6.87 \times 10^8 \text{ M}^{-1} \text{ s}^{-1}$  (Figure 9).

**Nanosecond transient absorption spectroscopy.** The photocatalytic mechanism was studied by nanosecond laser flash photolysis experiments which were performed by exciting at 455 nm a deaerated aqueous acetate (1 M) buffer solutions at pH 4.5 containing **Ru** (100  $\mu\text{M}$ ) and NaHA/H<sub>2</sub>A (0.1 M), in presence or absence of **Rh-tpy** (200  $\mu\text{M}$ ). Samples were prepared in a glove box under an argon atmosphere within a quartz cell (cell width =  $10 \times 10 \text{ mm}^2$ ). Transient absorption spectra were acquired using a LP 920K system from Edinburgh Instruments. Excitation at 455 nm was carried out from the third-harmonic of a Brilliant-Quantel Nd:YAG Laser at 6 Hz, equipped with an OPO (Rainbow). A Xe900 pulsed Xenon Lamp is used as probe source. The photons were dispersed using a monochromator, transcribed by a R928 (Hamamatsu) photomultiplier and recorded on a TDS3012C (Tektronix) oscilloscope. Single wavelengths as well as global analyses of the transient absorption data were performed using Igor Pro wavemetrics software.

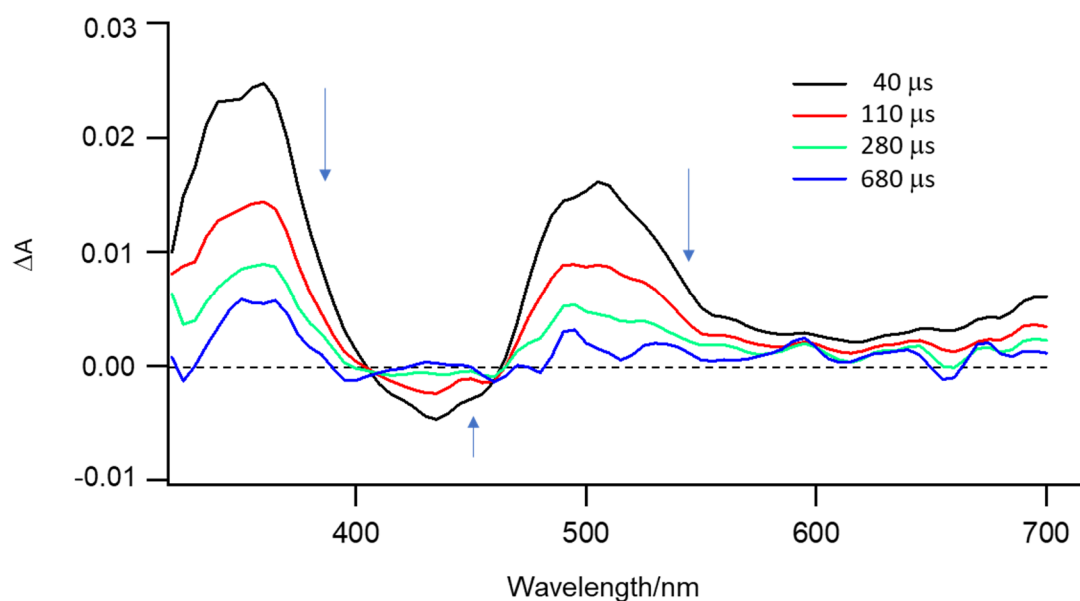

**Figure S1:** Transient absorption spectra recorded at different times after laser excitation ( $\lambda = 455 \text{ nm}$ ) of a deaerated aqueous solution of acetate buffer (1M) containing **Ru** (100  $\mu\text{M}$ ) and NaHA/H<sub>2</sub>A (0.1 M) at pH 4.5 (pathlength = 1 cm). The signal growth at 510 nm occurs within 1.5  $\mu\text{s}$  after laser excitation (see Figure S2).

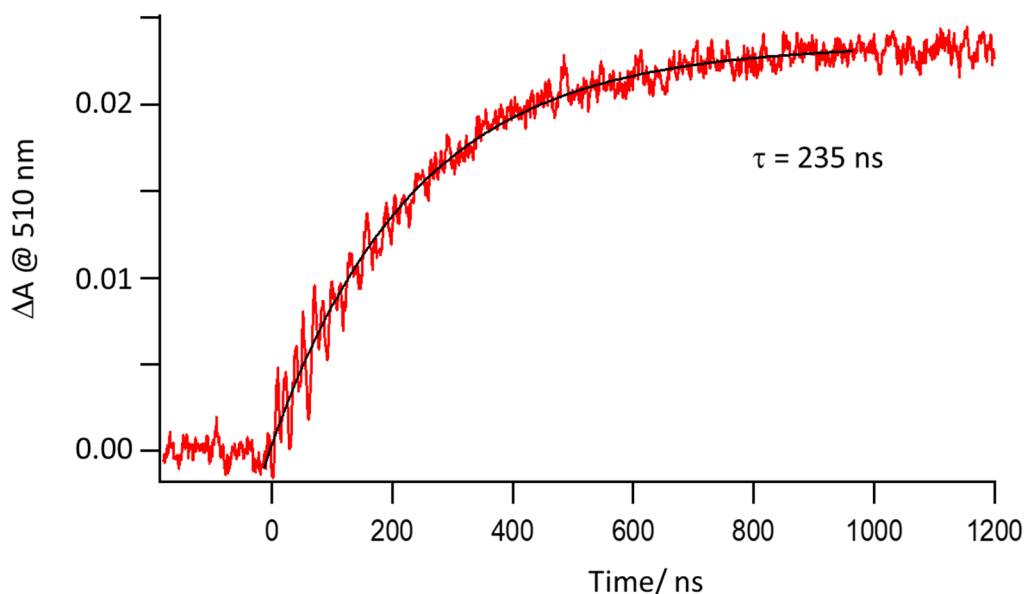

**Figure S2:** Transient absorption trace on the nanosecond time scale recorded at 510 nm after laser excitation at 455 nm of a deaerated aqueous solution of acetate buffer (1M) containing **Ru** (100  $\mu\text{M}$ ) and NaHA/H<sub>2</sub>A (0.1 M) at pH 4.5. the growth of  $\Delta A$  is fitted by a monoexponential function leading to a time constant of 235 ns (*i.e.*  $k = 4.25 \times 10^6 \text{ s}^{-1}$ ). After 1.5  $\mu\text{s}$ , the signal starts to decay.

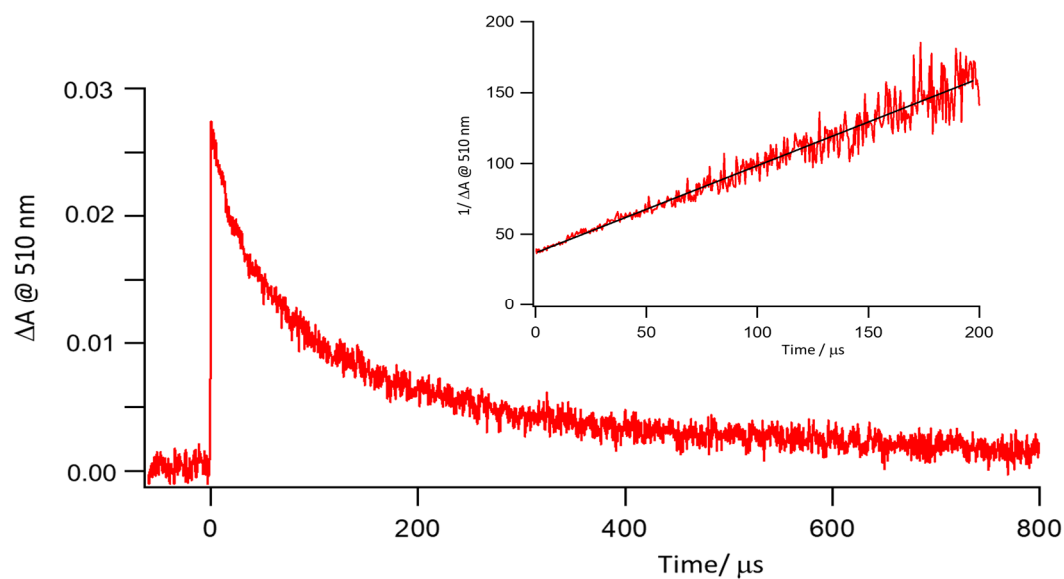

**Figure S3:** Transient absorption trace on the microsecond time scale recorded at 510 nm after laser excitation at 455 nm of a deaerated aqueous solution of acetate buffer (1M) containing **Ru** (100  $\mu\text{M}$ ) and NaHA/H<sub>2</sub>A (0.1 M) at pH 4.5. Inset: second order kinetics analysis of the decay. The slope gives  $k_{\text{BET}} / (\Delta\epsilon \lambda) = 0.62 \times 10^6 \text{ s}^{-1}$ . Assuming  $\Delta\epsilon$  to  $1.2 \times 10^4 \text{ M}^{-1} \text{ cm}^{-1}$ , [9] the kinetics rate constant for the back electron transfer process is estimated to  $7.4 \times 10^9 \text{ M}^{-1} \text{ s}^{-1}$ .

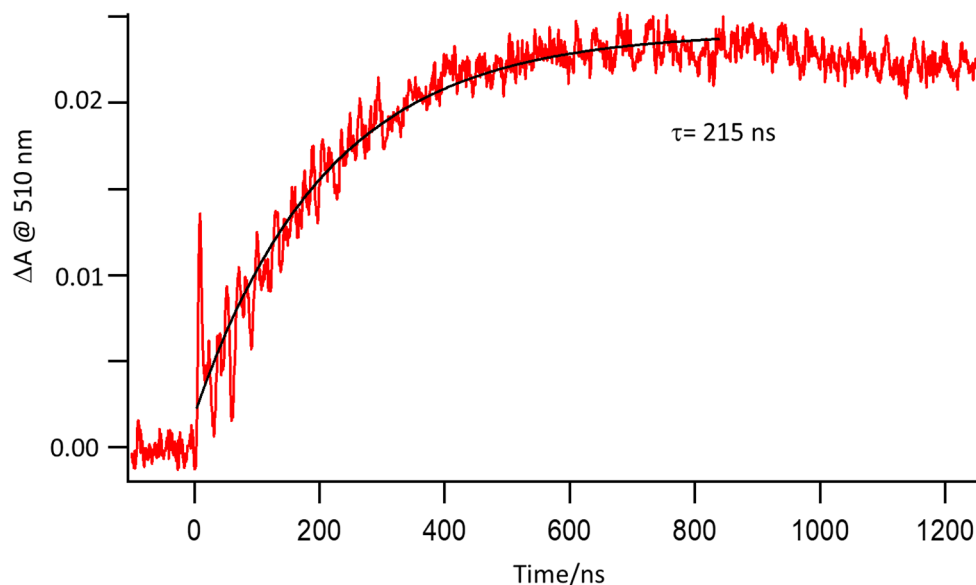

**Figure S4:** Transient absorption trace on the nanosecond time scale recorded at 510 nm after laser excitation at 455 nm of a deaerated aqueous solution of acetate buffer (1M) containing **Ru** (100  $\mu\text{M}$ ), NaHA/H<sub>2</sub>A (0.1 M) and **Rh-tpy** (200  $\mu\text{M}$ ) at pH 4.5. the growth of  $\Delta A$  is fitted by a monoexponential function leading to a time constant of 215 ns. After 1.5  $\mu\text{s}$  the signal starts to decay.

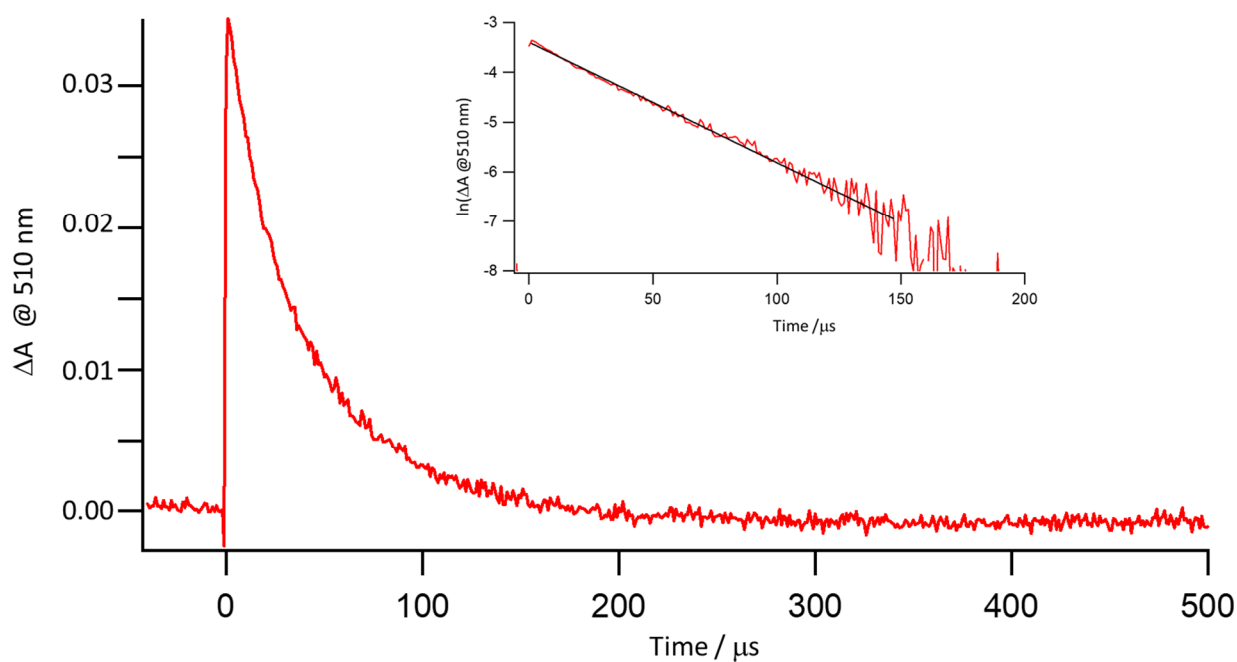

**Figure S5:** Transient absorption trace on the microsecond time scale recorded at 510 nm after laser excitation at 455 nm of a deaerated aqueous solution of acetate buffer (1M) containing **Ru** (100  $\mu\text{M}$ ), NaHA/H<sub>2</sub>A (0.1 M) and **Rh-tpy** (200  $\mu\text{M}$ ) at pH 4.5. Inset: pseudo first order kinetics analysis of the decay. The slope gives a rate constant of  $2.4 \cdot 10^4 \text{ s}^{-1}$ .

**Estimation of the electron transfer rate between  $\text{Ru}^-$  and  $\text{HA}^\bullet$ , and between  $\text{Ru}^-$  and  $\text{Rh}^{\text{III}}\text{-tpy}$ .** After the electron transfer from the sacrificial electron donor  $\text{HA}^-$  to the **Ru** excited state ( $^*\text{Ru}^{\text{II}}$ ) to generate the reduced state  $\text{Ru}^-$  and  $\text{HA}^\bullet$ , two processes of electron transfer are in competition (See Scheme 4): the back electron transfer (BET) between  $\text{Ru}^-$  and  $\text{HA}^\bullet$  and the reduction of  $\text{Rh}^{\text{III}}\text{-tpy}$  by  $\text{Ru}^-$  (ET). The rates ( $v$ ) of these two redox reactions can be expressed as:

$$v_{\text{BET}} = k_{\text{BET}}[\text{Ru}^-][\text{HA}^\bullet] \quad (1)$$

$$v_{\text{ET}} = k_{\text{ET}}[\text{Ru}^-][\text{Rh}^{\text{III}}\text{-tpy}] \quad (2)$$

Where  $v_{\text{BET}}$  and  $v_{\text{ET}}$  are the rates of these two redox reactions ( $\text{M s}^{-1}$ ),  $k_{\text{BET}}$  and  $k_{\text{ET}}$  are the rate constants of these two redox reactions (respectively  $7.4 \times 10^9$  and  $1.2 \times 10^8 \text{ M}^{-1} \text{ s}^{-1}$ ), and  $[\text{Ru}^-]$ ,  $[\text{HA}^\bullet]$  and  $[\text{Rh}^{\text{III}}\text{-tpy}]$  are the concentrations of the respective species.  $[\text{Rh}^{\text{III}}\text{-tpy}]$  is equal to  $200 \mu\text{M}$ .

Considering that the quantum yield of  $\text{Ru}^-$  formation *via* the reductive quenching of  $^*\text{Ru}^{\text{II}}$  by  $\text{HA}^-$  is 25 % [10], the concentration  $[\text{Ru}^-]$  can be estimated from the concentration  $[^*\text{Ru}^{\text{II}}]$ , which can be calculated from the variation of the absorption ( $\Delta A_{450} = -0.01$ ) recorded at 450 nm just after the laser excitation (around 10 ns) in the transient absorption spectra of the solution **Ru** ( $100 \mu\text{M}$ )/ $\text{H}_2\text{A}/\text{HA}^-$  ( $0.1 \text{ M}$ ) (of note, the  $\Delta A$  value is similar for the solution **Ru** ( $100 \mu\text{M}$ )/**Rh-tpy** ( $200 \mu\text{M}$ )/ $\text{H}_2\text{A}/\text{HA}^-$  ( $0.1 \text{ M}$ )), and the variation of the extinction coefficient at 450 nm of the solution ( $\Delta \epsilon_{450} = \epsilon_{450}^{\text{Ru}^*} - \epsilon_{450}^{\text{Ru}} = -11\,000 \text{ M}^{-1} \text{ cm}^{-1}$ ) [11]. So, following the Beer-Lambert law, the concentration  $[^*\text{Ru}^{\text{II}}]$  could be expressed as:

$$[^*\text{Ru}^{\text{II}}] = \Delta A_{450} / (\Delta \epsilon_{450} \times l) \quad (3)$$

Where  $l$  is the optical pathlength,  $l = 1 \text{ cm}$ . Consequently,  $[^*\text{Ru}^{\text{II}}]$  can be estimated at  $9.1 \times 10^{-7} \text{ M}$  and  $[\text{Ru}^-]$  at  $2.27 \times 10^{-7} \text{ M}$ .

In addition, just after the first electron transfer between  $\text{HA}^-$  and  $^*\text{Ru}^{\text{II}}$ , we can consider that the concentration of  $\text{HA}^\bullet$  is equal to  $\text{Ru}^-$  (*i.e.*  $[\text{Ru}^-] = [\text{HA}^\bullet]$ ).

Considering all these values, the values of  $v_{\text{BET}}$  and  $v_{\text{ET}}$  are estimated at  $3.81 \times 10^{-4}$  and  $5.45 \times 10^{-3} \text{ M s}^{-1}$ , which corresponds to a  $v_{\text{ET}}/v_{\text{BET}}$  ratio of 14.3.

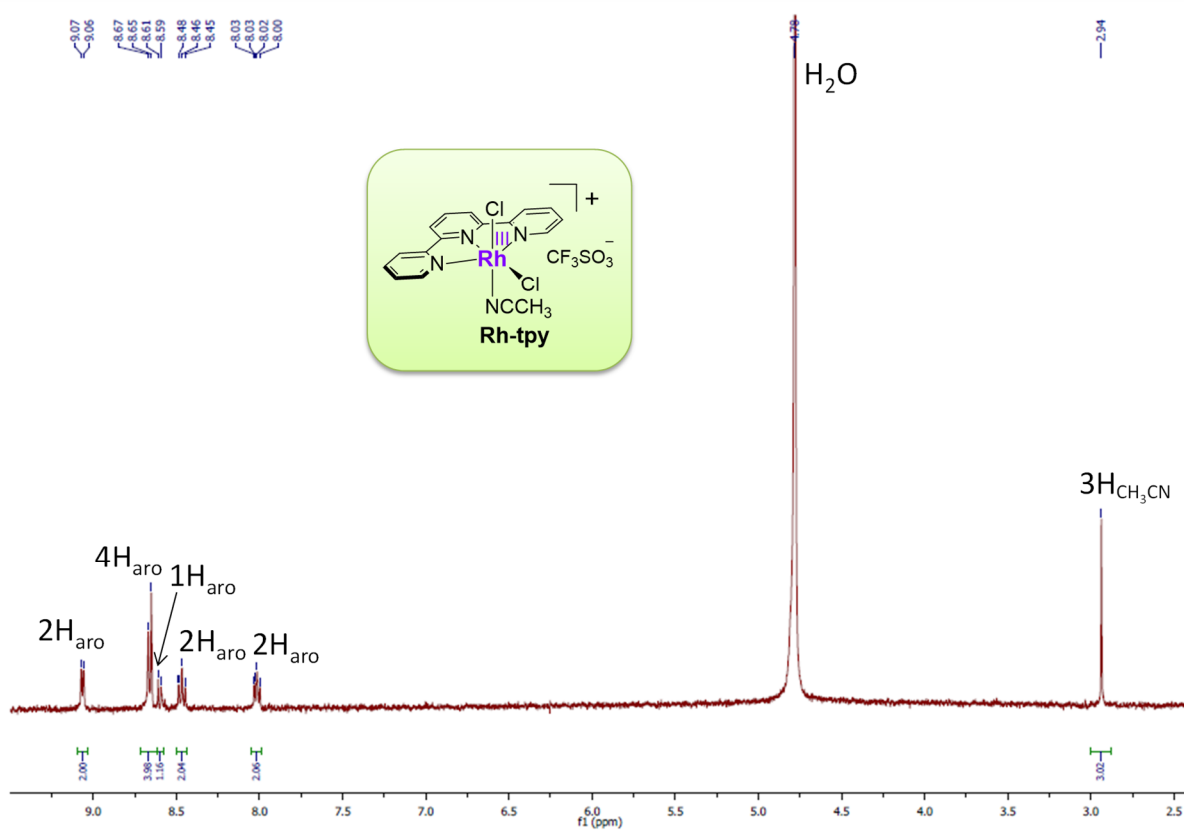

**Figure S6.**  $^1\text{H}$  NMR spectrum (400 MHz) in  $\text{D}_2\text{O}$  of  $[\text{Rh}(\text{tpy})(\text{CH}_3\text{CN})\text{Cl}_2](\text{CF}_3\text{SO}_3)$ .

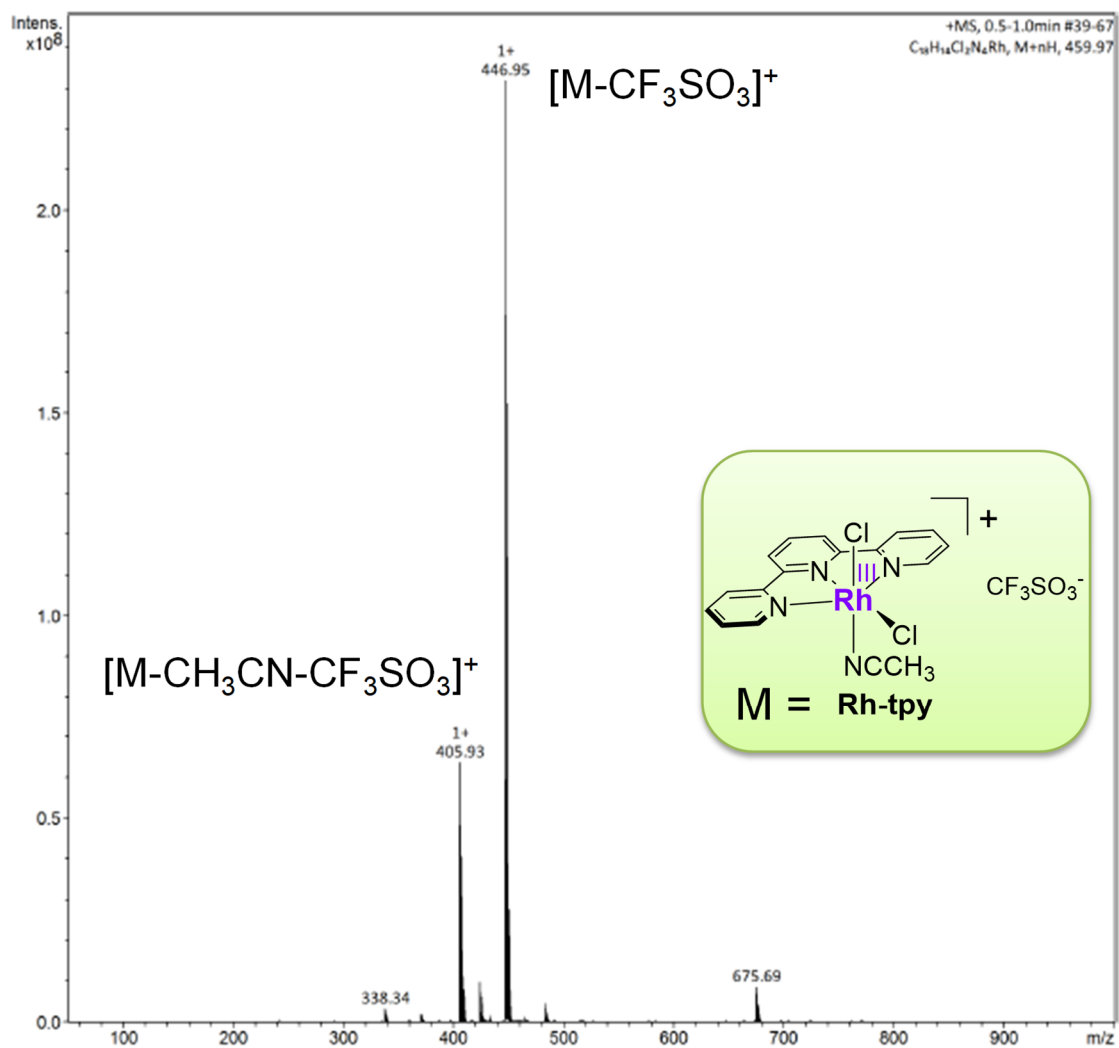

**Figure S7.** Positive ESI-MS spectrum of  $[Rh(tpy)(CH_3CN)Cl_2](CF_3SO_3)$  in a mixture of  $CH_3CN/DMF/H_2O$ .



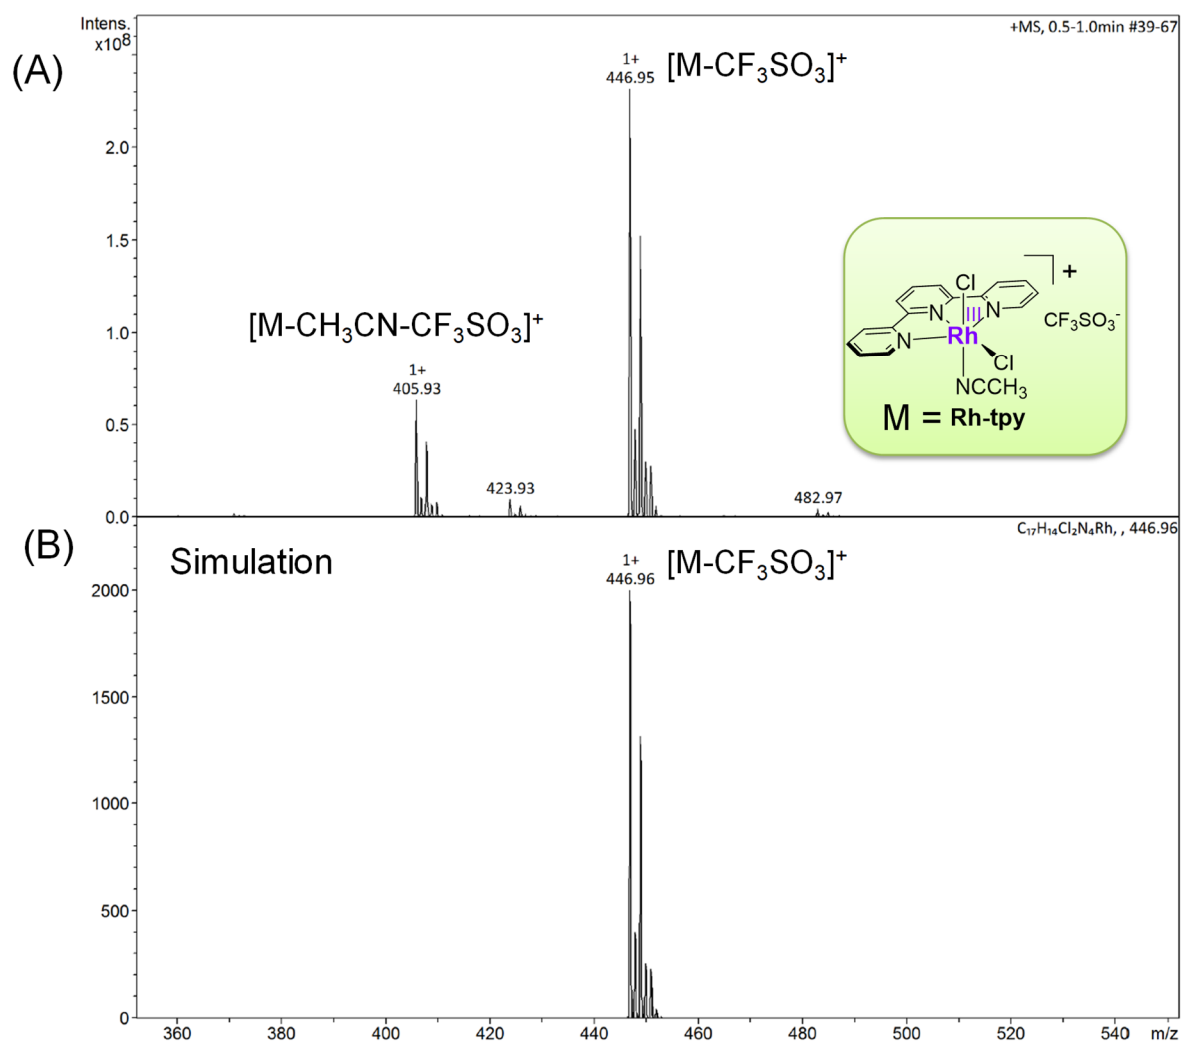

**Figure S8.** Experimental positive ESI-MS spectrum of  $[\text{Rh}(\text{tpy})(\text{CH}_3\text{CN})\text{Cl}_2](\text{CF}_3\text{SO}_3)$  (A) and simulation of the main isotopic massif at  $m/z = 446.96$  corresponding to  $[\text{Rh}(\text{tpy})(\text{CH}_3\text{CN})\text{Cl}_2]^+$  (B).

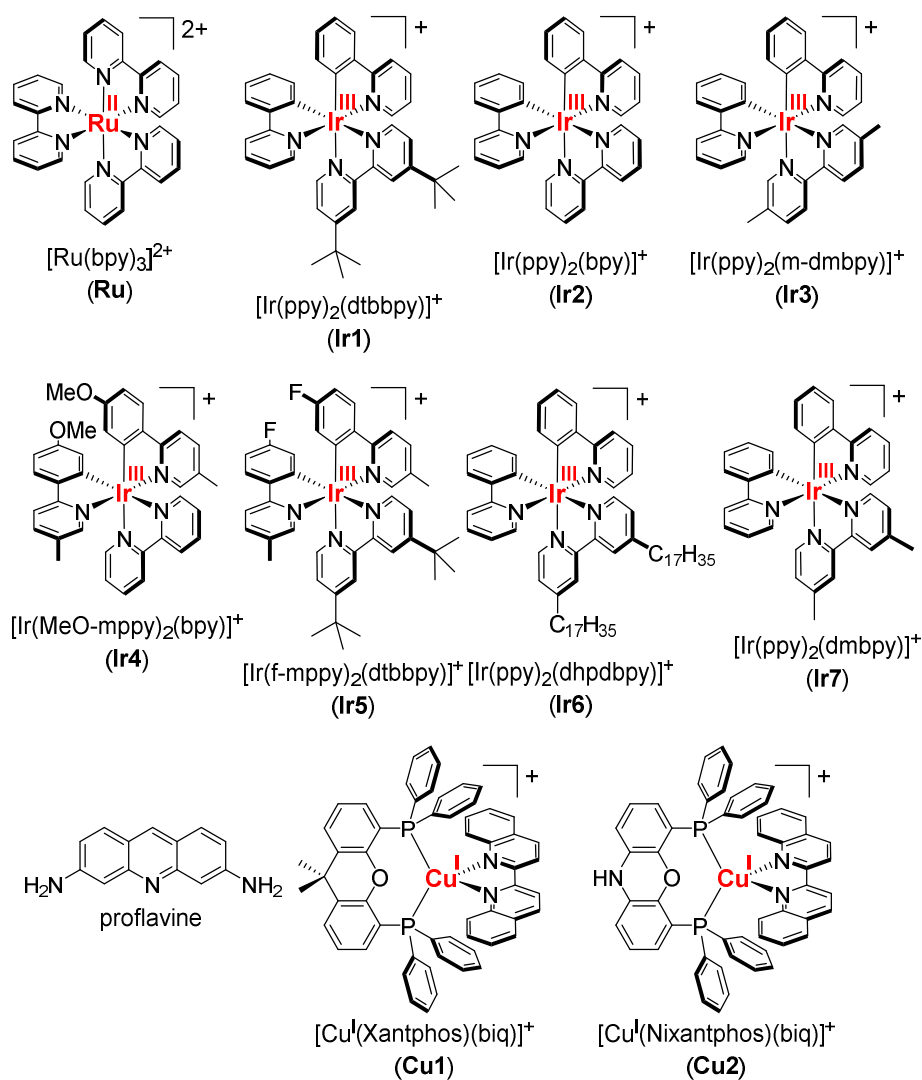

**Scheme S1.** Photosensitizers previously reported in three-component systems for light-driven  $\text{H}_2$  production using Rh catalysts in aqueous or hydro-organic solutions.

**Table S8.** Summary of the experimental conditions and photocatalytic performances of the various three-component systems (SD/PS/Cat) using Rh catalysts in hydro-organic solution.

| PS conc.                                                                 | Cat conc.                                                                                                                           | PS/Cat Ratio | SD conc.             | Solvent                                                                | Irrad. Source ( $\lambda$ ) | TON Cat | V <sub>H<sub>2</sub></sub> in mL (hours) | Vol. of solution | Author (Year)                           |
|--------------------------------------------------------------------------|-------------------------------------------------------------------------------------------------------------------------------------|--------------|----------------------|------------------------------------------------------------------------|-----------------------------|---------|------------------------------------------|------------------|-----------------------------------------|
| <b>[Ir(ppy)<sub>2</sub>(m-dmbpy)]<sup>+</sup> (Ir3)</b><br>100 $\mu$ M   | <b>[Rh(bpy)<sub>3</sub>]<sup>3+</sup> (Rh1)</b><br>100 $\mu$ M                                                                      | 1/1          | TEOA<br>0.6 M        | MeCN/H <sub>2</sub> O<br>9/1                                           | Blue LED<br>(460 nm)        | 70      | 1.72<br>(20)                             | 10 mL            | Bernhard<br>(2008) [12]                 |
| <b>[Ir(MeO-mppy)<sub>2</sub>(bpy)]<sup>+</sup> (Ir4)</b><br>100 $\mu$ M  | <b>[Rh(dfppy)<sub>3</sub>]<sup>3+</sup> (Rh12)</b><br>100 $\mu$ M                                                                   | 1/1          | TEOA<br>0.6 M        | MeCN/H <sub>2</sub> O<br>9/1                                           | Blue LED<br>(460 nm)        | 60      | 1.47<br>(20)                             | 10 mL            |                                         |
| <b>Ir3</b><br>100 $\mu$ M                                                | <b>[Rh(dMeObpy)<sub>3</sub>]<sup>3+</sup> (Rh13)</b><br>100 $\mu$ M                                                                 | 1/1          | TEOA<br>0.6 M        | MeCN/H <sub>2</sub> O<br>9/1                                           | Blue LED<br>(460 nm)        | 40      | 0.98<br>(20)                             | 10 mL            |                                         |
| <b>[Ir(f-mppy)<sub>2</sub>(dtbbpy)]<sup>+</sup> (Ir5)</b><br>100 $\mu$ M | <b>[Rh(dtbbpy)<sub>3</sub>]<sup>3+</sup> (Rh11)</b><br>100 $\mu$ M                                                                  | 1/1          | TEOA<br>0.6 M        | MeCN/H <sub>2</sub> O<br>9/1                                           | Blue LED<br>(460 nm)        | 150     | 3.68<br>(20)                             | 10 mL            |                                         |
| <b>Ir5</b><br>150 $\mu$ M                                                | <b>Rh11</b><br>50 $\mu$ M                                                                                                           | 3/1          | TEA<br>0.6 M         | THF/H <sub>2</sub> O<br>8/2                                            | Blue LED<br>(460 nm)        | 5196    | 63.7<br>(20)                             | 10 mL            |                                         |
| <b>[Ir(ppy)<sub>2</sub>(dhdpbpy)]<sup>+</sup> (Ir6)</b><br>1 mM          | <b>[Rh(dhdpbpy)<sub>2</sub>Cl]<sup>+</sup> (Rh14)</b><br>62.5 $\mu$ M                                                               | 16/1         | Oxalic Acid<br>75 mM | tol/H <sub>2</sub> O/<br>Oct-OH/<br>Oct-NH <sub>2</sub><br>3.8/4/0.2/1 | Blue LED<br>(460 nm)        | 400     | 5.51<br>(17)                             | 9 mL             | Bernhard<br>(2017) [13]                 |
| <b>[Ir(ppy)<sub>2</sub>(bpy)]<sup>+</sup> (Ir2)</b><br>500 $\mu$ M       | <b>[Rh<sub>2</sub>(<math>\mu</math>-OAc)<sub>4</sub>(H<sub>2</sub>O)<sub>2</sub>] (Rh5)</b><br>5 $\mu$ M                            | 100/1        | TEA<br>0.36 M        | THF/H <sub>2</sub> O<br>68/32                                          | Xe Lamp<br>(>380 nm)        | 3857    | 9.45<br>(12)                             | 10 mL            | Kataoka (2019)<br>[14]                  |
|                                                                          | <b>[Rh<sub>2</sub>(<math>\mu</math>-CF<sub>3</sub>CO<sub>2</sub>)<sub>4</sub>(H<sub>2</sub>O)<sub>2</sub>] (Rh15)</b><br>5 $\mu$ M  | 100/1        | TEA<br>0.36 M        | THF/H <sub>2</sub> O<br>68/32                                          | Xe Lamp<br>(>380 nm)        | 3334    | 8.18<br>(12)                             | 10 mL            |                                         |
|                                                                          | <b>[Rh<sub>2</sub>(<math>\mu</math>-CCl<sub>3</sub>CO<sub>2</sub>)<sub>4</sub>(H<sub>2</sub>O)<sub>2</sub>] (Rh16)</b><br>5 $\mu$ M | 100/1        | TEA<br>0.36 M        | THF/H <sub>2</sub> O<br>68/32                                          | Xe Lamp<br>(>380 nm)        | 3138    | 7.69<br>(12)                             | 10 mL            |                                         |
|                                                                          | <b>Rh11</b><br>10 $\mu$ M                                                                                                           | 50/1         | TEA<br>0.36 M        | THF/H <sub>2</sub> O<br>68/32                                          | Xe Lamp<br>(>380 nm)        | 2362    | 5.79<br>(12)                             | 10 mL            |                                         |
| <b>[Ir(ppy)<sub>2</sub>(dmbpy)]<sup>+</sup> (Ir7)</b><br>500 $\mu$ M     | <b>Rh5</b><br>5 $\mu$ M                                                                                                             | 100/1        | TEA<br>0.36 M        | THF/H <sub>2</sub> O<br>68/32                                          | Xe Lamp<br>(>380 nm)        | ~6500   | ~15.9<br>(12)                            | 10 mL            | Kataoka (2019)<br>[15]                  |
| <b>[Ir(ppy)<sub>2</sub>(dtbbpy)]<sup>+</sup> (Ir1)</b><br>500 $\mu$ M    | <b>Rh5</b><br>5 $\mu$ M                                                                                                             | 100/1        | TEA<br>0.36 M        | THF/H <sub>2</sub> O<br>68/32                                          | Xe Lamp<br>(>380 nm)        | 9886    | 24.2<br>(12)                             | 10 mL            |                                         |
| <b>Ir1</b><br>50 $\mu$ M                                                 | <b>[Rh<sub>2</sub>(<math>\mu</math>-OAc)<sub>2</sub>(OAc)<sub>2</sub>] (Rh17)</b><br>50 $\mu$ M                                     | 1/1          | TEA<br>0.6 M         | THF/H <sub>2</sub> O<br>8/2                                            | Artificial sun<br>(>350 nm) | 16      | 0.20<br>(20)                             | 10 mL            | Wang<br>(2012) [16]                     |
|                                                                          | <b>[Rh<sub>2</sub>(bpy)<sub>2</sub>(<math>\mu</math>-OAc)<sub>4</sub>(OAc)<sub>2</sub>] (Rh8)</b><br>50 $\mu$ M                     | 1/1          | TEA<br>0.6 M         | THF/H <sub>2</sub> O<br>8/2                                            | Artificial sun<br>(>350 nm) | 62      | 0.76<br>(20)                             | 10 mL            |                                         |
|                                                                          | <b>[Rh<sub>2</sub>(phen)<sub>2</sub>(<math>\mu</math>-OAc)<sub>2</sub>(OAc)<sub>2</sub>] (Rh9)</b><br>50 $\mu$ M                    | 1/1          | TEA<br>0.6 M         | THF/H <sub>2</sub> O<br>8/2                                            | Artificial sun<br>(>350 nm) | 379     | 4.64<br>(20)                             | 10 mL            |                                         |
| <b>Ir2</b><br>926 $\mu$ M                                                | <b>[Rh(py)<sub>4</sub>Cl]<sup>+</sup> (Rh18)</b><br>926 $\mu$ M                                                                     | 1/1          | TEOA<br>0.56 M       | MeCN/H <sub>2</sub> O<br>9/1                                           | LED<br>(450 nm)             | ~15     | ~7.35<br>(3)                             | 21.6 mL          | Kozlova<br>(2016) [17]                  |
|                                                                          | <b>[Rh(4-pic)<sub>4</sub>Cl]<sup>+</sup> (Rh19)</b><br>926 $\mu$ M                                                                  | 1/1          | TEOA<br>0.56 M       | MeCN/H <sub>2</sub> O<br>9/1                                           | LED<br>(450 nm)             | ~16     | ~7.84<br>(3)                             | 21.6 mL          |                                         |
|                                                                          | <b>Rh19<sup>a</sup></b><br>926 $\mu$ M                                                                                              | 1/1          | TEOA<br>0.56 M       | MeCN/H <sub>2</sub> O<br>9/1                                           | LED<br>(450 nm)             | 100     | 49.0<br>(5.5)                            | 21.6 mL          |                                         |
|                                                                          | <b>[Rh(3-pic)<sub>4</sub>Cl]<sup>+</sup> (Rh20)</b><br>926 $\mu$ M                                                                  | 1/1          | TEOA<br>0.56 M       | MeCN/H <sub>2</sub> O<br>9/1                                           | LED<br>(450 nm)             | ~18     | ~8.82<br>(3)                             | 21.6 mL          |                                         |
|                                                                          | <b>[Rh(4-pyCOOH)<sub>3</sub>(4-pyCOO)Cl]<sup>+</sup> (Rh21)</b><br>926 $\mu$ M                                                      | 1/1          | TEOA<br>0.56 M       | MeCN/H <sub>2</sub> O<br>9/1                                           | LED<br>(450 nm)             | ~18.5   | ~9.07<br>(3)                             | 21.6 mL          |                                         |
| <b>Ir2</b><br>926 $\mu$ M                                                | <b>[RhCl(H<sub>2</sub>O)<sub>2</sub>(py)<sub>3</sub>]<sup>+</sup> (Rh22)</b><br>926 $\mu$ M                                         | 1/1          | TEOA<br>0.56 M       | MeCN/H <sub>2</sub> O<br>9/1                                           | LED<br>(450 nm)             | ~15     | ~7.35<br>(1)                             | 21.6 mL          | Vasilchenko &<br>Kozlova<br>(2018) [18] |
| <b>[Cu(Xantphos)(biq)]<sup>+</sup> (Cu1)</b><br>360 $\mu$ M              | <b>[Rh(dmbpy)<sub>2</sub>Cl]<sup>+</sup> (Rh2)</b><br>1 $\mu$ M                                                                     | 360/1        | DMA<br>1.57 M        | DMF/H <sub>2</sub> O<br>96/4                                           | Blue LED<br>(447.5 nm)      | 140     | 0.017<br>(1)                             | 5.1 mL           | White<br>(2018) [19]                    |

|                                                                          |                                                                                          |      |                        |                              |                        |     |              |        |                      |
|--------------------------------------------------------------------------|------------------------------------------------------------------------------------------|------|------------------------|------------------------------|------------------------|-----|--------------|--------|----------------------|
|                                                                          | <b>Rh2</b><br>5 $\mu$ M                                                                  | 72/1 | DMA<br>1.57 M          | DMF/H <sub>2</sub> O<br>96/4 | Blue LED<br>(447.5 nm) | 72  | 0.044<br>(1) | 5.1 mL |                      |
|                                                                          | <b>Rh2</b><br>10 $\mu$ M                                                                 | 36/1 | DMA<br>1.57 M          | DMF/H <sub>2</sub> O<br>96/4 | Blue LED<br>(447.5 nm) | 53  | 0.066<br>(1) | 5.1 mL |                      |
|                                                                          | <b>Rh2</b><br>36 $\mu$ M                                                                 | 10/1 | DMA<br>1.57 M          | DMF/H <sub>2</sub> O<br>96/4 | Blue LED<br>(447.5 nm) | 25  | 0.11<br>(1)  | 5.1 mL |                      |
|                                                                          | <b>[Rh(bpy)<sub>2</sub>Cl<sub>2</sub>]<sup>+</sup></b><br><b>(Rh23)</b><br>36 $\mu$ M    | 10/1 | DMA<br>1.57 M          | DMF/H <sub>2</sub> O<br>96/4 | Blue LED<br>(447.5 nm) | 22  | 0.10<br>(1)  | 5.1 mL |                      |
|                                                                          | <b>[Rh(dmebpy)<sub>2</sub>Cl<sub>2</sub>]<sup>+</sup></b><br><b>(Rh24)</b><br>36 $\mu$ M | 10/1 | DMA<br>1.57 M          | DMF/H <sub>2</sub> O<br>96/4 | Blue LED<br>(447.5 nm) | 43  | 0.19<br>(1)  | 5.1 mL |                      |
| <b>Cu1</b><br>360 $\mu$ M                                                | <b>Rh2</b><br>36 $\mu$ M                                                                 | 10/1 | DMA<br>1.55 M          | DMF/H <sub>2</sub> O<br>96/4 | Blue LED<br>(447.5 nm) | 260 | 1.18<br>(3)  | 5.1 mL | White<br>(2019) [20] |
| <b>[Cu(Nixantphos)</b><br><b>(biq)]<sup>+</sup> (Cu2)</b><br>360 $\mu$ M | <b>Rh2</b><br>36 $\mu$ M                                                                 | 10/1 | DMA<br>1.55 M          | DMF/H <sub>2</sub> O<br>96/4 | Blue LED<br>(447.5 nm) | 180 | 0.81<br>(3)  | 5.1 mL |                      |
| <b>Cu1</b><br>360 $\mu$ M                                                | <b>Rh2</b><br>36 $\mu$ M                                                                 | 10/1 | DMA<br>0.8 M           | DMF/H <sub>2</sub> O<br>96/4 | Blue LED<br>(447.5 nm) | 151 | 0.69<br>(3)  | 5.1 mL | White<br>(2020) [21] |
|                                                                          | <b>Rh2</b><br>36 $\mu$ M                                                                 | 10/1 | <i>p</i> -DMT<br>0.8 M | DMF/H <sub>2</sub> O<br>96/4 | Blue LED<br>(447.5 nm) | 197 | 0.88<br>(3)  | 5.1 mL |                      |

TON<sub>Cat</sub> and TOF<sub>Cat</sub> are respectively the maximum turnover number and the initial turnover frequencies (TOF<sub>Cat</sub> = TON<sub>Cat</sub> h<sup>-1</sup>) per catalyst exhibited by the system. V<sub>H<sub>2</sub></sub> is the total volume of H<sub>2</sub> produced after a given time of irradiation. n.d. : non determined. bpy is 2,2'-bipyridine, dmbpy is 4,4'-dimethyl-2,2'-bipyridine, m-dmbpy is 5,5'-dimethyl-2,2'-bipyridine, dtbbpy is 4,4'-di-tertbutyl-2,2'-bipyridine, dfbpy is 5,5'-difluoro-2,2'-bipyridine, dMeObpy is 5,5'-dimethoxy-2,2'-bipyridine, ppy is 2-phenylpyridine, MeO-mppy is 5-Methyl-2-(4-methoxyphenyl)pyridine, f-mppy is 5-methyl-2-(4-fluorophenyl)pyridine, dhpdby is 4,4'-diheptadecyl-2,2'-bipyridine, dmebpy is 2,2'-bipyridine-4,4'-dimethyl ester, py is pyridine, 4-pic is 4-picoline, 3-pic is 3-picoline, 4-pyCOOH is pyridine-4-carboxylic acid, Xantphos is 4,5-bis(diphenylphosphino)-9,9-dimethylxanthene, Nixantphos is 4,6-bis-(diphenylphosphino)-10H-phenoxazine, biq is 2,2'-biquinoline, OAc is acetate, phen is phenanthroline, tol is toluene, oct-OH is 1-octanol, Oct-NH<sub>2</sub> is 1-octylamine, THF is tetrahydrofuran, DMF is N,N-diethylformamide, TEOA is triethanolamine, TEA is triethylamine, DMA is N,N-dimethylaniline, *p*-DMT is N,N-dimethyl-*p*-toluidine.

<sup>a</sup> Addition of 4-picoline (2 M).

**Table S9.** Summary of the experimental conditions and photocatalytic performances of various three-component systems (SD/PS/Cat) using Rh catalysts in pure aqueous solution.

| PS conc.                                                            | Cat conc.                                                                                                                         | PS/Cat Ratio | SD conc.                                   | pH               | Irrad. Source ( $\lambda$ ) | TON <sub>Cat</sub> | V <sub>H<sub>2</sub></sub> in mL (hours) | Vol. of solution | Author (Year)                 |
|---------------------------------------------------------------------|-----------------------------------------------------------------------------------------------------------------------------------|--------------|--------------------------------------------|------------------|-----------------------------|--------------------|------------------------------------------|------------------|-------------------------------|
| [Ru(bpy) <sub>3</sub> ] <sup>2+</sup> (Ru)<br>440 $\mu$ M           | [Rh(bpy) <sub>3</sub> ] <sup>3+</sup> (Rh1) <sup>a</sup><br>1.56 mM                                                               | 1/3.5        | EDTA<br>0.2 M                              | 5.2              | halogen Lamp<br>(>400 nm)   | 6                  | 1.6<br>(3)                               | 7 mL             | Lehn & Sauvage<br>(1979) [22] |
| Ru<br>190 $\mu$ M                                                   | [RhCl(dpm) <sub>3</sub> ] <sup>3+</sup> (Rh4)<br>190 $\mu$ M                                                                      | 1/1          | H <sub>2</sub> A<br>0.1 M                  | 5.0              | Projector Lamp<br>(>408 nm) | 1000               | 18.6<br>(1.55)                           | 4 mL             | Oishi<br>(1987) [23]          |
| Ru<br>667 $\mu$ M                                                   | Rh4<br>167 $\mu$ M                                                                                                                | 4/1          | H <sub>2</sub> A<br>16.7 mM                | 4.5              | halogen W-Lamp<br>(>400 nm) | >2000              | >24.5<br>(4)                             | 3 mL             | Bauer<br>(1994) [24]          |
| Ru<br>40 $\mu$ M                                                    | [Rh <sub>2</sub> ( $\mu$ -OAc) <sub>4</sub> (H <sub>2</sub> O) <sub>2</sub> ]<br>(Rh5) <sup>b</sup><br>0.1 mM                     | 1/2.5        | EDTA<br>30 mM                              | 5.0 <sup>c</sup> | Xe Lamp<br>(240-550 nm)     | 4.0                | 0.178<br>(6)                             | 10 mL            | Sakai<br>(2010) [25]          |
|                                                                     | [Rh <sub>2</sub> ( $\mu$ -gly) <sub>4</sub> (H <sub>2</sub> O) <sub>2</sub> ]<br>(Rh6) <sup>b</sup><br>0.1 mM                     | 1/2.5        | EDTA<br>30 mM                              | 5.0 <sup>c</sup> | Xe Lamp<br>(240-550 nm)     | 4.5                | 0.201<br>(6)                             | 10 mL            |                               |
|                                                                     | [Rh <sub>2</sub> ( $\mu$ -CF <sub>3</sub> CO <sub>2</sub> ) <sub>4</sub> (acetone) <sub>2</sub> ]<br>(Rh7) <sup>b</sup><br>0.1 mM | 1/2.5        | EDTA<br>30 mM                              | 5.0 <sup>c</sup> | Xe Lamp<br>(240-550 nm)     | 2.3                | 0.104<br>(6)                             | 10 mL            |                               |
|                                                                     | [Rh <sub>2</sub> (bpy) <sub>2</sub> ( $\mu$ -OAc) <sub>2</sub> (OAc) <sub>2</sub> ]<br>(Rh8) <sup>b</sup><br>0.1 mM               | 1/2.5        | EDTA<br>30 mM                              | 5.0 <sup>c</sup> | Xe Lamp<br>(240-550 nm)     | 1.9                | 0.086<br>(6)                             | 10 mL            |                               |
|                                                                     | [Rh <sub>2</sub> ( $\mu$ -BL) <sub>4</sub> ] <sup>2+</sup><br>(Rh10) <sup>b</sup><br>0.1 mM                                       | 1/2.5        | EDTA<br>30 mM                              | 5.0 <sup>c</sup> | Xe Lamp<br>(240-550 nm)     | 0.09               | 0.004<br>(6)                             | 10 mL            |                               |
| [Ir(ppy) <sub>2</sub> (dtbbpy)] <sup>+</sup><br>(Ir1)<br>50 $\mu$ M | [Rh <sub>2</sub> (phen) <sub>2</sub> ( $\mu$ -OAc) <sub>2</sub> (OAc) <sub>2</sub> ]<br>(Rh9)<br>50 $\mu$ M                       | 1/1          | TEA<br>0.6 M                               | n.d.             | Artificial sun<br>(>350 nm) | 3.3                | 0.04<br>(20)                             | 10 mL            | Wang<br>(2012) [16]           |
| Ru<br>2 mM                                                          | [Rh(Cp*)(bpy)(H <sub>2</sub> O)] <sup>2+</sup><br>(Rh3)<br>1 mM                                                                   | 2/1          | HA <sup>-</sup> /H <sub>2</sub> A<br>1.1 M | 3.6              | Xe Lamp<br>(>430 nm)        | 100                | 4.9<br>(3)                               | 2 mL             | Fukuzumi<br>(2011) [26]       |
| Ru<br>500 $\mu$ M                                                   | [Rh(dmbpy) <sub>2</sub> Cl <sub>2</sub> ] <sup>+</sup><br>(Rh2)<br>10 $\mu$ M                                                     | 50/1         | HA <sup>-</sup> /H <sub>2</sub> A<br>1.1 M | 4.0              | Xe Lamp<br>(400-700 nm)     | 640 <sup>g</sup>   | 0.78 <sup>g</sup><br>(20)                | 5 mL             | Collomb<br>(2013) [3]         |
|                                                                     | Rh2<br>5 $\mu$ M                                                                                                                  | 100/1        | HA <sup>-</sup> /H <sub>2</sub> A<br>1.1 M | 4.0              | Xe Lamp<br>(400-700 nm)     | 865 <sup>g</sup>   | 0.53 <sup>g</sup><br>(20)                | 5 mL             |                               |
|                                                                     | Rh2<br>1 $\mu$ M                                                                                                                  | 500/1        | HA <sup>-</sup> /H <sub>2</sub> A<br>1.1 M | 4.0              | Xe Lamp<br>(400-700 nm)     | 1010 <sup>g</sup>  | 0.12 <sup>g</sup><br>(8)                 | 5 mL             |                               |
| Ru<br>100 $\mu$ M                                                   | Rh2<br>10 $\mu$ M                                                                                                                 | 10/1         | HA <sup>-</sup> /H <sub>2</sub> A<br>1.1 M | 4.0              | Xe Lamp<br>(400-700 nm)     | 320                | 0.39<br>(5)                              | 5 mL             |                               |
|                                                                     | Rh4<br>10 $\mu$ M                                                                                                                 | 10/1         | HA <sup>-</sup> /H <sub>2</sub> A<br>1.1 M | 5.0              | Xe Lamp<br>(400-700 nm)     | 57                 | 0.07<br>(13.5)                           | 5 mL             |                               |
|                                                                     | Rh3<br>10 $\mu$ M                                                                                                                 | 10/1         | HA <sup>-</sup> /H <sub>2</sub> A<br>1.1 M | 3.6              | Xe Lamp<br>(400-700 nm)     | 108                | 0.13<br>(7)                              | 5 mL             |                               |
| [Ir(ppy) <sub>2</sub> (bpy)] <sup>+</sup><br>(Ir2)<br>100 $\mu$ M   | Rh2<br>10 $\mu$ M                                                                                                                 | 10/1         | HA <sup>-</sup> /H <sub>2</sub> A<br>1.1 M | 4.0              | Xe Lamp<br>(400-700 nm)     | 170                | 0.21<br>(12)                             | 5 mL             |                               |
| Ru<br>530 $\mu$ M                                                   | Rh2<br>10 $\mu$ M                                                                                                                 | 53/1         | HA <sup>-</sup> /H <sub>2</sub> A<br>0.1 M | 4.5 <sup>d</sup> | Xe Lamp<br>(400-700 nm)     | 1139 <sup>g</sup>  | 1.40 <sup>c</sup><br>(21.7)              | 5 mL             | This work                     |
|                                                                     | Rh2<br>5 $\mu$ M                                                                                                                  | 106/1        | HA <sup>-</sup> /H <sub>2</sub> A<br>0.1 M | 4.5 <sup>d</sup> | Xe Lamp<br>(400-700 nm)     | 778 <sup>g</sup>   | 0.48 <sup>c</sup><br>(24)                | 5 mL             |                               |
|                                                                     | Rh2<br>1 $\mu$ M                                                                                                                  | 530/1        | HA <sup>-</sup> /H <sub>2</sub> A<br>0.1 M | 4.5 <sup>d</sup> | Xe Lamp<br>(400-700 nm)     | 772 <sup>g</sup>   | 0.09 <sup>c</sup><br>(22)                | 5 mL             |                               |
|                                                                     | [Rh(tpy)(CH <sub>3</sub> CN)Cl <sub>2</sub> ] <sup>+</sup> (Rhtpy)<br>10 $\mu$ M                                                  | 53/1         | HA <sup>-</sup> /H <sub>2</sub> A<br>0.1 M | 4.5 <sup>d</sup> | Xe Lamp<br>(400-700 nm)     | 300 <sup>g</sup>   | 0.37 <sup>c</sup><br>(21.5)              | 5 mL             |                               |
|                                                                     | Rhtpy<br>5 $\mu$ M                                                                                                                | 106/1        | HA <sup>-</sup> /H <sub>2</sub> A<br>0.1 M | 4.5 <sup>d</sup> | Xe Lamp<br>(400-700 nm)     | 558 <sup>g</sup>   | 0.34 <sup>c</sup><br>(25)                | 5 mL             |                               |
|                                                                     | Rhtpy<br>1 $\mu$ M                                                                                                                | 530/1        | HA <sup>-</sup> /H <sub>2</sub> A<br>0.1 M | 4.5 <sup>d</sup> | Xe Lamp<br>(400-700 nm)     | 1012 <sup>g</sup>  | 0.12 <sup>c</sup><br>(22.3)              | 5 mL             |                               |

TON<sub>Cat</sub> is the corrected value of maximum turnover number per catalyst exhibited by the system. V<sub>H<sub>2</sub></sub> is the total volume of H<sub>2</sub> produced after a given time of irradiation. n.d. : non determined. bpy is 2,2'-bipyridine, dmbpy is 4,4'-dimethyl-2,2'-bipyridine, dtbbpy is 4,4'-di-tertbutyl-2,2'-bipyridine, ppy is 2-phenylpyridine, dpm is

diphenylphosphinobenzen-*m*-sulphonate, Cp\* is pentamethylcyclopentadiene, tpy is 2,2':6',2''-terpyridine, OAc is acetate, gly is glycolate, BL is 1,3-diisocyanopropane, phen is phenanthroline, TEOA is triethanolamine, EDTA is , HA<sup>-</sup> and H<sub>2</sub>A are respectively ascorbate and ascorbic acid.

<sup>a</sup> Photocatalysis at 30°C ; <sup>b</sup> addition of methylviologen nitrate (2 mM) ; <sup>c</sup> use of an acetate buffer (0.1 M) ; <sup>d</sup> use of an acetate buffer (1 M) ; <sup>e</sup> The values of TON<sub>Cat</sub><sup>\*</sup> and V<sub>H<sub>2</sub></sub><sup>\*</sup> has been corrected by subtracting the production of H<sub>2</sub> stemming from **Ru** without catalyst.

## References

1. Dolomanov, O. V.; Bourhis, L. J.; Gildea, R. J.; Howard, J. A. K.; Puschmann, H., OLEX2: a complete structure solution, refinement and analysis program. *Journal of Applied Crystallography* **2009**, 42, 339-341.
2. Pavlishchuk, V. V.; Addison, A. W., Conversion constants for redox potentials measured versus different reference electrodes in acetonitrile solutions at 25°C. *Inorg. Chim. Acta.* **2000**, 298, 97-102.
3. Stoll, T.; Gennari, M.; Serrano, I.; Fortage, J.; Chauvin, J.; Odobel, F.; Rebarz, M.; Poizat, O.; Sliwa, M.; Deronzier, A.; Collomb, M. N., [Rh<sup>III</sup>(dmbpy)<sub>2</sub>Cl<sub>2</sub>]<sup>+</sup> as a Highly Efficient Catalyst for Visible-Light-Driven Hydrogen Production in Pure Water: Comparison with Other Rhodium Catalysts. *Chem.-Eur. J.* **2013**, 19, 782-792.
4. Baffert, C.; Dumas, S.; Chauvin, J.; Leprêtre, J.-C.; Collomb, M.-N.; Deronzier, A., Photoinduced oxidation of [Mn(L)<sub>3</sub>]<sup>2+</sup> and [Mn<sub>2</sub>O<sub>2</sub>(L)<sub>4</sub>]<sup>3+</sup> (L = 2,2'-bipyridine and 4,4'-dimethyl-2,2'-bipyridine) with the [Ru(bpy)<sub>3</sub>]<sup>2+</sup>/-aryl diazonium salt system. *PhysChemChemPhys* **2005**, 7, 202-210.
5. Juris, A.; Balzani, V.; Barigelletti, F.; Campagna, S.; Belser, P.; Von Zelewsky, A., Ru(II) polypyridine complexes - Photophysics, photochemistry, electrochemistry, and chemiluminescence. *Coord. Chem. Rev.* **1988**, 84, 85-277.
6. Kirch, M.; Lehn, J.-M.; Sauvage, J.-P., Hydrogen Generation by Visible Light Irradiation of Aqueous Solutions of Metal Complexes. An approach to the photochemical conversion and storage of solar energy. *Helv. Chim. Acta* **1979**, 62, 1345-1384.
7. Sivanesan, A.; John, S. A., Determination Of L-dopa using electropolymerized 3,3',3''-tetraaminophthalocyanatonickel (II) film on glassy carbon electrode. *Biosensors & Bioelectronics* **2007**, 23, 708-713.
8. Varma, S.; Castillo, C. E.; Stoll, T.; Fortage, J.; Blackman, A. G.; Molton, F.; Deronzier, A.; Collomb, M.-N., Efficient Photocatalytic Hydrogen Production in Water Using a Cobalt(III) Tetraaza-Macrocyclic Catalyst: Electrochemical Generation of the Low-Valent Co(I) Species and its Reactivity Toward Proton Reduction. *PhysChemChemPhys* **2013**, 15, 17544-17552.
9. Baxendale, J. H.; Fiti, M., Transient species in the reactions of some pyridyl complex ions with hydrated electrons. *J. Chem. Soc., Dalton Trans.* **1972**, 1995-1998.
10. Gueret, R.; Castillo, C. E.; Rebarz, M.; Thomas, F.; Hargrove, A.-A.; Pécaut, J.; Sliwa, M.; Fortage, J.; Collomb, M.-N., Cobalt(III) tetraaza-macrocyclic complexes as efficient catalyst for photoinduced hydrogen production in water: theoretical investigation of the electronic structure of the reduced species and mechanistic insight. *J. Photochem. Photobiol. B: Biol.* **2015**, 152, 82-94.
11. Müller, P.; Brettel, K., [Ru(bpy)<sub>3</sub>]<sup>2+</sup> as a reference in transient absorption spectroscopy: differential absorption coefficients for formation of the long-lived <sup>3</sup>MLCT excited state. *Photochem. Photobiol. Sci.* **2012**, 11, 632-636.

12. Cline, E. D.; Adamson, S. E.; Bernhard, S., Homogeneous Catalytic System for Photoinduced Hydrogen Production Utilizing Iridium and Rhodium Complexes. *Inorg. Chem.* **2008**, *47*, 10378-10388.
13. Kagalwala, H. N.; Chirdon, D. N.; Mills, I. N.; Budwal, N.; Bernhard, S., Light-Driven Hydrogen Generation from Microemulsions Using Metallosurfactant Catalysts and Oxalic Acid. *Inorg. Chem.* **2017**, *56*, 10162-10171.
14. Kataoka, Y.; Yano, N.; Kohara, Y.; Tsuji, T.; Inoue, S.; Kawamoto, T., Experimental and Theoretical Study of Photochemical Hydrogen Evolution Catalyzed by Paddlewheel-Type Dirhodium Complexes with Electron Withdrawing Carboxylate Ligands. *ChemCatChem* **2019**, *11*, 6218-6226.
15. Kataoka, Y.; Yano, N.; Handa, M.; Kawamoto, T., Intrinsic hydrogen evolution capability and a theoretically supported reaction mechanism of a paddlewheel-type dirhodium complex. *Dalton Trans.* **2019**, *48*, 7302-7312.
16. Xie, J.; Li, C.; Zhou, Q.; Wang, W.; Hou, Y.; Zhang, B.; Wang, X., Large Improvement in the Catalytic Activity Due to Small Changes in the Diimine Ligands: New Mechanistic Insight into the Dirhodium(II,II) Complex-Based Photocatalytic H<sub>2</sub> Production. *Inorg. Chem.* **2012**, *51*, 6376-6384.
17. Vasilchenko, D. B.; Tkachev, S. V.; Kurenkova, A. Y.; Kozlova, E. A.; Kozlov, D. V., Photocatalytic hydrogen evolution by iridium(III)–rhodium(III) system: Effect of the free ligand addition. *International Journal of Hydrogen Energy* **2016**, *41*, 2592-2597.
18. Vasilchenko, D.; Tkachev, S.; Baidina, I.; Korolkov, I.; Berdyugin, S.; Kozlova, E.; Kozlov, D., Preparation of a rhodium(III) cis-diaqua complex by protic acid induced oxalate-release from mer-[Rh(C<sub>2</sub>O<sub>4</sub>)Cl(py)<sub>3</sub>]. *New Journal of Chemistry* **2018**, *42*, 19637-19643.
19. McCullough, B. J.; Neyhouse, B. J.; Schrage, B. R.; Reed, D. T.; Osinski, A. J.; Ziegler, C. J.; White, T. A., Visible-Light-Driven Photosystems Using Heteroleptic Cu(I) Photosensitizers and Rh(III) Catalysts To Produce H<sub>2</sub>. *Inorg. Chem.* **2018**, *57*, 2865-2875.
20. Saeedi, S.; Xue, C.; McCullough, B. J.; Roe, S. E.; Neyhouse, B. J.; White, T. A., Probing the Diphosphine Ligand's Impact within Heteroleptic, Visible-Light-Absorbing Cu(I) Photosensitizers for Solar Fuels Production. *ACS Appl. Energy Mater.* **2019**, *2*, 131-143.
21. Saeedi, S.; White, T. A., Insight into the Reductive Quenching of a Heteroleptic Cu(I) Photosensitizer for Photocatalytic H<sub>2</sub> Production. *ACS Appl. Energy Mater.* **2020**, *3*, 56-65.
22. Kirch, M.; Lehn, J. M.; Sauvage, J. P., Hydrogen Generation by Visible-Light Irradiation of Aqueous-Solutions of Metal-Complexes - Approach to the Photo-Chemical Conversion and Storage of Solar-Energy. *Helv. Chim. Acta* **1979**, *62*, 1345-1384.
23. Oishi, S., A Water-Soluble Wilkinsons Complex as Homogeneous Catalyst for the Photochemical Reduction of Water. *J. Mol. Catal.* **1987**, *39*, 225-232.
24. Bauer, R.; Werner, H. A. F., Investigations on a Homogeneous Wilkinsons Catalyst for the Water Photolysis. *Int. J. Hydrogen Energy* **1994**, *19*, 497-499.
25. Tanaka, S.; Masaoka, S.; Yamauchi, K.; Annaka, M.; Sakai, K., Photochemical and thermal hydrogen production from water catalyzed by carboxylate-bridged dirhodium(II) complexes. *Dalton Trans.* **2010**, *39*, 11218-11226.
26. Fukuzumi, S.; Kobayashi, T.; Suenobu, T., Photocatalytic Production of Hydrogen by Disproportionation of One-Electron-Reduced Rhodium and Iridium–Ruthenium Complexes in Water. *Angew. Chem. Int. Ed.* **2011**, *50*, 728-731.
